# Supplementary material for: DeepCarc: Deep Learning-Powered Carcinogenicity Prediction Using Model-Level Representation
Source: Front Artif Intell. 2021 Nov 18;4:757780. doi: 10.3389/frai.2021.757780 (PMC8636933; doi:10.3389/frai.2021.757780)
Supplement: Supplementary file 6 [file Table1.XLSX]

## Sheet: carcinogenicity_863_compounds
ID	CAS	CID	SMILES	NAME	inchi_all	OVERALL	label	usage
1	97-59-6	204	C1(C(=O)NC(=O)N1)NC(=O)N	Allantoin	POJWUDADGALRAB-UHFFFAOYSA-N	negative	0	training
2	71-43-2	241	C1=CC=CC=C1	Benzene	UHOVQNZJYSORNB-UHFFFAOYSA-N	cancer-liver	1	training
3	120-80-9	289	C1=CC=C(C(=C1)O)O	Catechol	YCIMNLLNPGFGHC-UHFFFAOYSA-N	cancer-other	1	training
4	143-50-0	299	C1(=O)C2(C3(C4(C1(C5(C2(C3(C(C45Cl)(Cl)Cl)Cl)Cl)Cl)Cl)Cl)Cl)Cl	Kepone	LHHGDZSESBACKH-UHFFFAOYSA-N	cancer-liver	1	training
5	91-64-5	323	C1=CC=C2C(=C1)C=CC(=O)O2	Coumarin	ZYGHJZDHTFUPRJ-UHFFFAOYSA-N	cancer-liver	1	training
6	50-00-0	712	C=O	Formaldehyde	WSFSSNUMVMOOMR-UHFFFAOYSA-N	cancer-other	1	training
7	319-84-6	727	C1(C(C(C(C(C1Cl)Cl)Cl)Cl)Cl)Cl	alpha-1,2,3,4,5,6-Hexachlorocyclohexane	JLYXXMFPNIAWKQ-UHFFFAOYSA-N	cancer-liver	1	training
8	87-51-4	802	C1=CC=C2C(=C1)C(=CN2)CC(=O)O	Indole-3-acetic acid	SEOVTRFCIGRIMH-UHFFFAOYSA-N	negative	0	training
9	91-20-3	931	C1=CC=C2C=CC=CC2=C1	Naphthalene	UFWIBTONFRDIAS-UHFFFAOYSA-N	cancer-other	1	training
10	56-38-2	991	CCOP(=S)(OCC)OC1=CC=C(C=C1)[N+](=O)[O-]	Parathion	LCCNCVORNKJIRZ-UHFFFAOYSA-N	cancer-other	1	training
11	87-86-5	992	C1(=C(C(=C(C(=C1Cl)Cl)Cl)Cl)Cl)O	2,3,4,5,6-Pentachlorophenol	IZUPBVBPLAPZRR-UHFFFAOYSA-N	cancer-liver	1	training
12	105650-23-5	1530	CN1C2=C(N=CC(=C2)C3=CC=CC=C3)N=C1N	PhIP.HCl	UQVKZNNCIHJZLS-UHFFFAOYSA-N	cancer-other	1	training
13	56-49-5	1674	CC1=C2CCC3=C2C(=CC4=C3C=CC5=CC=CC=C54)C=C1	3-Methylcholanthrene	PPQNQXQZIWHJRB-UHFFFAOYSA-N	cancer-other	1	training
14	57-41-0	1775	C1=CC=C(C=C1)C2(C(=O)NC(=O)N2)C3=CC=CC=C3	5,5-Diphenylhydantoin	CXOFVDLJLONNDW-UHFFFAOYSA-N	cancer-liver	1	training
15	148-24-3	1923	C1=CC2=C(C(=C1)O)N=CC=C2	8-Hydroxyquinoline	MCJGNVYPOGVAJF-UHFFFAOYSA-N	negative	0	training
16	968-81-0	1989	CC(=O)C1=CC=C(C=C1)S(=O)(=O)NC(=O)NC2CCCCC2	Acetohexamide	VGZSUPCWNCWDAN-UHFFFAOYSA-N	negative	0	training
17	18559-94-9	2083	CC(C)(C)NCC(C1=CC(=C(C=C1)O)CO)O	Salbutamol	NDAUXUAQIAJITI-UHFFFAOYSA-N	cancer-other	1	training
18	60-80-0	2206	CC1=CC(=O)N(N1C)C2=CC=CC=C2	Phenazone	VEQOALNAAJBPNY-UHFFFAOYSA-N	cancer-other	1	training
19	50-78-2	2244	CC(=O)OC1=CC=CC=C1C(=O)O	Aspirin	BSYNRYMUTXBXSQ-UHFFFAOYSA-N	negative	0	training
20	1912-24-9	2256	CCNC1=NC(=NC(=N1)Cl)NC(C)C	Atrazine	MXWJVTOOROXGIU-UHFFFAOYSA-N	cancer-other	1	training
21	446-86-6	2265	CN1C=NC(=C1SC2=NC=NC3=C2NC=N3)[N+](=O)[O-]	Azathioprine	LMEKQMALGUDUQG-UHFFFAOYSA-N	cancer-other	1	training
22	86-50-0	2268	COP(=S)(OC)SCN1C(=O)C2=CC=CC=C2N=N1	Azinphosmethyl	CJJOSEISRRTUQB-UHFFFAOYSA-N	cancer-other	1	training
23	103-33-3	2272	C1=CC=C(C=C1)N=NC2=CC=CC=C2	Azobenzene	DMLAVOWQYNRWNQ-UHFFFAOYSA-N	cancer-liver	1	training
24	50-32-8	2336	C1=CC=C2C3=C4C(=CC2=C1)C=CC5=C4C(=CC=C5)C=C3	Benzo(a)pyrene	FMMWHPNWAFZXNH-UHFFFAOYSA-N	cancer-other	1	training
25	85-68-7	2347	CCCCOC(=O)C1=CC=CC=C1C(=O)OCC2=CC=CC=C2	Butyl benzyl phthalate	IRIAEXORFWYRCZ-UHFFFAOYSA-N	cancer-other	1	training
26	58-08-2	2519	CN1C=NC2=C1C(=O)N(C(=O)N2C)C	Caffeine	RYYVLZVUVIJVGH-UHFFFAOYSA-N	negative	0	training
27	56980-93-9	2663	CCN(CC)C(=O)NC1=CC(=C(C=C1)OCC(CNC(C)(C)C)O)C(=O)C	Celiprolol	JOATXPAWOHTVSZ-UHFFFAOYSA-N	negative	0	training
28	305-03-3	2708	C1=CC(=CC=C1CCCC(=O)O)N(CCCl)CCCl	Chlorambucil	JCKYGMPEJWAADB-UHFFFAOYSA-N	cancer-other	1	training
29	101-21-3	2728	CC(C)OC(=O)NC1=CC(=CC=C1)Cl	Isopropyl-N-(3-chlorophenyl) carbamate	CWJSHJJYOPWUGX-UHFFFAOYSA-N	negative	0	training
30	2921-88-2	2730	CCOP(=S)(OCC)OC1=NC(=C(C=C1Cl)Cl)Cl	O,O-Diethyl-o-(3,5,6-trichloro-2-pyridyl)phosphorothiolate	SBPBAQFWLVIOKP-UHFFFAOYSA-N	negative	0	training
31	51481-61-9	2756	CC1=C(N=CN1)CSCCNC(=NC)NC#N	Cimetidine	AQIXAKUUQRKLND-UHFFFAOYSA-N	negative	0	training
32	52214-84-3	2763	CC(C)(C(=O)O)OC1=CC=C(C=C1)C2CC2(Cl)Cl	Ciprofibrate	KPSRODZRAIWAKH-UHFFFAOYSA-N	cancer-liver	1	training
33	637-07-0	2796	CCOC(=O)C(C)(C)OC1=CC=C(C=C1)Cl	Clofibrate	KNHUKKLJHYUCFP-UHFFFAOYSA-N	cancer-liver	1	training
34	50-18-0	2907	C1CNP(=O)(OC1)N(CCCl)CCCl	Cyclophosphamide	CMSMOCZEIVJLDB-UHFFFAOYSA-N	cancer-other	1	training
35	117-10-2	2950	C1=CC2=C(C(=C1)O)C(=O)C3=C(C2=O)C=CC=C3O	Chrysazin	QBPFLULOKWLNNW-UHFFFAOYSA-N	cancer-liver	1	training
36	80-08-0	2955	C1=CC(=CC=C1N)S(=O)(=O)C2=CC=C(C=C2)N	Dapsone	MQJKPEGWNLWLTK-UHFFFAOYSA-N	cancer-other	1	training
37	439-14-5	3016	CN1C(=O)CN=C(C2=C1C=CC(=C2)Cl)C3=CC=CC=C3	Diazepam	AAOVKJBEBIDNHE-UHFFFAOYSA-N	negative	0	training
38	333-41-5	3017	CCOP(=S)(OCC)OC1=NC(=NC(=C1)C)C(C)C	Diazinon	FHIVAFMUCKRCQO-UHFFFAOYSA-N	negative	0	training
39	72-55-9	3035	C1=CC(=CC=C1C(=C(Cl)Cl)C2=CC=C(C=C2)Cl)Cl	p,p'-DDE	UCNVFOCBFJOQAL-UHFFFAOYSA-N	cancer-liver	1	training
40	50-29-3	3036	C1=CC(=CC=C1C(C2=CC=C(C=C2)Cl)C(Cl)(Cl)Cl)Cl	DDT	YVGGHNCTFXOJCH-UHFFFAOYSA-N	cancer-liver	1	training
41	62-73-7	3039	COP(=O)(OC)OC=C(Cl)Cl	Dichlorvos	OEBRKCOSUFCWJD-UHFFFAOYSA-N	cancer-other	1	training
42	551-92-8	3090	CC1=NC=C(N1C)[N+](=O)[O-]	1,2-Dimethyl-5-nitroimidazole	IBXPYPUJPLLOIN-UHFFFAOYSA-N	cancer-other	1	training
43	97-77-8	3117	CCN(CC)C(=S)SSC(=S)N(CC)CC	Tetraethylthiuram disulfide	AUZONCFQVSMFAP-UHFFFAOYSA-N	negative	0	training
44	115-29-7	3224	C1C2C(COS(=O)O1)C3(C(=C(C2(C3(Cl)Cl)Cl)Cl)Cl)Cl	Endosulfan	RDYMFSUJUZBWLH-UHFFFAOYSA-N	negative	0	training
45	13838-16-9	3226	C(C(OC(F)F)(F)F)(F)Cl	Enflurane	JPGQOUSTVILISH-UHFFFAOYSA-N	negative	0	training
46	29975-16-4	3261	C1C2=NN=CN2C3=C(C=C(C=C3)Cl)C(=N1)C4=CC=CC=C4	Estazolam	CDCHDCWJMGXXRH-UHFFFAOYSA-N	negative	0	training
47	91-53-2	3293	CCOC1=CC2=C(C=C1)NC(C=C2C)(C)C	Ethoxyquin	DECIPOUIJURFOJ-UHFFFAOYSA-N	negative	0	training
48	55-38-9	3346	CC1=C(C=CC(=C1)OP(=S)(OC)OC)SC	Fenthion	PNVJTZOFSHSLTO-UHFFFAOYSA-N	cancer-other	1	training
49	51630-58-1	3347	CC(C)C(C1=CC=C(C=C1)Cl)C(=O)OC(C#N)C2=CC(=CC=C2)OC3=CC=CC=C3	Fenvalerate	NYPJDWWKZLNGGM-UHFFFAOYSA-N	negative	0	training
50	25812-30-0	3463	CC1=CC(=C(C=C1)C)OCCCC(C)(C)C(=O)O	Gemfibrozil	HEMJJKBWTPKOJG-UHFFFAOYSA-N	negative	0	training
51	76-44-8	3589	C1=CC(C2C1C3(C(=C(C2(C3(Cl)Cl)Cl)Cl)Cl)Cl)Cl	Heptachlor	FRCCEHPWNOQAEU-UHFFFAOYSA-N	cancer-liver	1	training
52	70-30-4	3598	C1=C(C(=C(C(=C1Cl)Cl)CC2=C(C(=CC(=C2Cl)Cl)Cl)O)O)Cl	Hexachlorophene	ACGUYXCXAPNIKK-UHFFFAOYSA-N	negative	0	training
53	3778-73-2	3690	C1CN(P(=O)(OC1)NCCCl)CCCl	Isophosphamide	HOMGKSMUEGBAAB-UHFFFAOYSA-N	cancer-other	1	training
54	88107-10-2	3969	CCCC1=C(C=CC(=C1O)C(=O)C)OCCCCC2=NNN=N2	Compound LY171883	MWYHLEQJTQJHSS-UHFFFAOYSA-N	cancer-liver	1	training
55	121-75-5	4004	CCOC(=O)CC(C(=O)OCC)SP(=S)(OC)OC	Malathion	JXSJBGJIGXNWCI-UHFFFAOYSA-N	negative	0	training
56	51-75-2	4033	CN(CCCl)CCCl	Nitrogen mustard	HAWPXGHAZFHHAD-UHFFFAOYSA-N	cancer-other	1	training
57	100-97-0	4101	C1N2CN3CN1CN(C2)C3	Hexamethylenetetramine	VKYKSIONXSXAKP-UHFFFAOYSA-N	negative	0	training
58	298-81-7	4114	COC1=C2C(=CC3=C1OC=C3)C=CC(=O)O2	8-Methoxypsoralen	QXKHYNVANLEOEG-UHFFFAOYSA-N	cancer-other	1	training
59	72-43-5	4115	COC1=CC=C(C=C1)C(C2=CC=C(C=C2)OC)C(Cl)(Cl)Cl	Methoxychlor	IAKOZHOLGAGEJT-UHFFFAOYSA-N	negative	0	training
60	443-48-1	4173	CC1=NC=C(N1CCO)[N+](=O)[O-]	Metronidazole	VAOCPAMSLUNLGC-UHFFFAOYSA-N	cancer-liver	1	training
61	389-08-2	4421	CCN1C=C(C(=O)C2=C1N=C(C=C2)C)C(=O)O	Nalidixic acid	MHWLWQUZZRMNGJ-UHFFFAOYSA-N	cancer-other	1	training
62	55-63-0	4510	C(C(CO[N+](=O)[O-])O[N+](=O)[O-])O[N+](=O)[O-]	Trinitroglycerin	SNIOPGDIGTZGOP-UHFFFAOYSA-N	cancer-liver	1	training
63	604-75-1	4616	C1=CC=C(C=C1)C2=NC(C(=O)NC3=C2C=C(C=C3)Cl)O	Oxazepam	ADIMAYPTOBDMTL-UHFFFAOYSA-N	cancer-liver	1	training
64	106-51-4	4650	C1=CC(=O)C=CC1=O	1,4-Benzoquinone	AZQWKYJCGOJGHM-UHFFFAOYSA-N	cancer-liver	1	training
65	149-29-1	4696	C1C=C2C(=CC(=O)O2)C(O1)O	Patulin	ZRWPUFFVAOMMNM-UHFFFAOYSA-N	negative	0	training
66	62-44-2	4754	CCOC1=CC=C(C=C1)NC(=O)C	Phenacetin	CPJSUEIXXCENMM-UHFFFAOYSA-N	cancer-other	1	training
67	50-06-6	4763	CCC1(C(=O)NC(=O)NC1=O)C2=CC=CC=C2	Phenobarbital	DDBREPKUVSBGFI-UHFFFAOYSA-N	cancer-liver	1	training
68	2955-38-6	4890	C1CC1CN2C(=O)CN=C(C3=C2C=CC(=C3)Cl)C4=CC=CC=C4	Prazepam	MWQCHHACWWAQLJ-UHFFFAOYSA-N	negative	0	training
69	55268-74-1	4891	C1CCC(CC1)C(=O)N2CC3C4=CC=CC=C4CCN3C(=O)C2	Praziquantel	FSVJFNAIGNNGKK-UHFFFAOYSA-N	negative	0	training
70	671-16-9	4915	CC(C)NC(=O)C1=CC=C(C=C1)CNNC	Procarbazine	CPTBDICYNRMXFX-UHFFFAOYSA-N	cancer-other	1	training
71	139-40-2	4937	CC(C)NC1=NC(=NC(=N1)Cl)NC(C)C	Propazine	WJNRPILHGGKWCK-UHFFFAOYSA-N	negative	0	training
72	121-79-9	4947	CCCOC(=O)C1=CC(=C(C(=C1)O)O)O	Propyl gallate	ZTHYODDOHIVTJV-UHFFFAOYSA-N	negative	0	training
73	128-44-9	5143	C1=CC=C2C(=C1)C(=O)NS2(=O)=O	Saccharin, sodium	CVHZOJJKTDOEJC-UHFFFAOYSA-N	cancer-other	1	training
74	94-59-7	5144	C=CCC1=CC2=C(C=C1)OCO2	Safrole	ZMQAAUBTXCXRIC-UHFFFAOYSA-N	cancer-liver	1	training
75	122-34-9	5216	CCNC1=NC(=NC(=N1)Cl)NCC	Simazine	ODCWYMIRDDJXKW-UHFFFAOYSA-N	negative	0	training
76	57-68-1	5327	CC1=CC(=NC(=N1)NS(=O)(=O)C2=CC=C(C=C2)N)C	Sulfamethazine	ASWVTGNCAZCNNR-UHFFFAOYSA-N	cancer-other	1	training
77	127-69-5	5344	CC1=C(ON=C1C)NS(=O)(=O)C2=CC=C(C=C2)N	Sulfisoxazole	NHUHCSRWZMLRLA-UHFFFAOYSA-N	negative	0	training
78	846-50-4	5391	CN1C2=C(C=C(C=C2)Cl)C(=NC(C1=O)O)C3=CC=CC=C3	Temazepam, pharmaceutical grade	SEQDDYPDSLOBDC-UHFFFAOYSA-N	negative	0	training
79	23031-25-6	5403	CC(C)(C)NCC(C1=CC(=CC(=C1)O)O)O	Terbutaline	XWTYSIMOBUGWOL-UHFFFAOYSA-N	cancer-other	1	training
80	52-24-4	5453	C1CN1P(=S)(N2CC2)N3CC3	Thio-TEPA	FOCVUCIESVLUNU-UHFFFAOYSA-N	cancer-other	1	training
81	50892-23-4	5694	CC1=C(C(=CC=C1)NC2=CC(=NC(=N2)SCC(=O)O)Cl)C	[4-Chloro-6-(2,3-xylidino)-2-pyrimidinylthio]acetic acid	SZRPDCCEHVWOJX-UHFFFAOYSA-N	cancer-liver	1	training
82	50-07-7	5746	CC1=C(C(=O)C2=C(C1=O)N3C[C@H]4[C@@H]([C@@]3([C@@H]2COC(=O)N)OC)N4)N	Mitomycin-C	NWIBSHFKIJFRCO-WUDYKRTCSA-N	cancer-other	1	training
83	50-23-7	5754	C[C@]12CCC(=O)C=C1CC[C@@H]3[C@@H]2[C@H](C[C@]4([C@H]3CC[C@@]4(C(=O)CO)O)C)O	Hydrocortisone	JYGXADMDTFJGBT-VWUMJDOOSA-N	negative	0	training
84	50-24-8	5755	C[C@]12C[C@@H]([C@H]3[C@H]([C@@H]1CC[C@@]2(C(=O)CO)O)CCC4=CC(=O)C=C[C@]34C)O	Prednisolone	OIGNJSKKLXVSLS-VWUMJDOOSA-N	cancer-liver	1	training
85	50-28-2	5757	C[C@]12CC[C@H]3[C@H]([C@@H]1CC[C@@H]2O)CCC4=C3C=CC(=C4)O	Estradiol	VOXZDWNPVJITMN-ZBRFXRBCSA-N	cancer-other	1	training
86	50-55-5	5770	CO[C@H]1[C@@H](C[C@@H]2CN3CCC4=C([C@H]3C[C@@H]2[C@@H]1C(=O)OC)NC5=C4C=CC(=C5)OC)OC(=O)C6=CC(=C(C(=C6)OC)OC)OC	Reserpine	QEVHRUUCFGRFIF-MDEJGZGSSA-N	cancer-other	1	training
87	51-03-6	5794	CCCCOCCOCCOCC1=CC2=C(C=C1CCC)OCO2	Piperonyl butoxide	FIPWRIJSWJWJAI-UHFFFAOYSA-N	negative	0	training
88	53-03-2	5865	C[C@]12CC(=O)[C@H]3[C@H]([C@@H]1CC[C@@]2(C(=O)CO)O)CCC4=CC(=O)C=C[C@]34C	Prednisone	XOFYZVNMUHMLCC-ZPOLXVRWSA-N	negative	0	training
89	53-70-3	5889	C1=CC=C2C(=C1)C=CC3=CC4=C(C=CC5=CC=CC=C54)C=C32	Dibenz(a,h)anthracene	LHRCREOYAASXPZ-UHFFFAOYSA-N	cancer-other	1	training
90	53-95-2	5896	CC(=O)N(C1=CC2=C(C=C1)C3=CC=CC=C3C2)O	N-Hydroxy-2-acetylaminofluorene	SOKUIEGXJHVFDV-UHFFFAOYSA-N	cancer-liver	1	training
91	53-96-3	5897	CC(=O)NC1=CC2=C(C=C1)C3=CC=CC=C3C2	2-Acetylaminofluorene	CZIHNRWJTSTCEX-UHFFFAOYSA-N	cancer-liver	1	training
92	92-13-7	5910	CC[C@H]1[C@H](COC1=O)CC2=CN=CN2C	Pilocarpine	QCHFTSOMWOSFHM-WPRPVWTQSA-N	negative	0	training
93	55-80-1	5934	CC1=CC(=CC=C1)N=NC2=CC=C(C=C2)N(C)C	3'-Methyl-4-dimethylaminoazobenzene	LVTFSVIRYMXRSR-UHFFFAOYSA-N	cancer-liver	1	training
94	56-23-5	5943	C(Cl)(Cl)(Cl)Cl	Carbon tetrachloride	VZGDMQKNWNREIO-UHFFFAOYSA-N	cancer-liver	1	training
95	56-75-7	5959	C1=CC(=CC=C1[C@H]([C@@H](CO)NC(=O)C(Cl)Cl)O)[N+](=O)[O-]	Chloramphenicol	WIIZWVCIJKGZOK-RKDXNWHRSA-N	negative	0	training
96	57-14-7	5976	CN(C)N	1,1-Dimethylhydrazine	RHUYHJGZWVXEHW-UHFFFAOYSA-N	cancer-liver	1	training
97	57-50-1	5988	C([C@@H]1[C@H]([C@@H]([C@H]([C@H](O1)O[C@]2([C@H]([C@@H]([C@H](O2)CO)O)O)CO)O)O)O)O	Sucrose	CZMRCDWAGMRECN-UGDNZRGBSA-N	negative	0	training
98	57-97-6	6001	CC1=C2C=CC3=CC=CC=C3C2=C(C4=CC=CC=C14)C	7,12-Dimethylbenz(a)anthracene	ARSRBNBHOADGJU-UHFFFAOYSA-N	cancer-other	1	training
99	58-15-1	6009	CC1=C(C(=O)N(N1C)C2=CC=CC=C2)N(C)C	4-Dimethylaminoantipyrine	RMMXTBMQSGEXHJ-UHFFFAOYSA-N	negative	0	training
100	58-33-3	6014	CC(CN1C2=CC=CC=C2SC3=CC=CC=C31)N(C)C.Cl	Promethazine.HCl	XXPDBLUZJRXNNZ-UHFFFAOYSA-N	negative	0	training
101	62-23-7	6108	C1=CC(=CC=C1C(=O)O)[N+](=O)[O-]	p-Nitrobenzoic acid	OTLNPYWUJOZPPA-UHFFFAOYSA-N	cancer-other	1	training
102	63-25-2	6129	CNC(=O)OC1=CC=CC2=CC=CC=C21	Carbaryl	CVXBEEMKQHEXEN-UHFFFAOYSA-N	cancer-other	1	training
103	67-72-1	6214	C(C(Cl)(Cl)Cl)(Cl)(Cl)Cl	Hexachloroethane	VHHHONWQHHHLTI-UHFFFAOYSA-N	cancer-liver	1	training
104	67-98-1	6222	CCN(CC)CCOC1=CC=C(C=C1)C(CC2=CC=C(C=C2)OC)(C3=CC=CC=C3)O	MER-25	KDYQVUUCWUPJGE-UHFFFAOYSA-N	negative	0	training
105	68-23-5	6231	C[C@]12CC[C@H]3[C@H]([C@@H]1CC[C@]2(C#C)O)CCC4=C3CCC(=O)C4	Norethynodrel	ICTXHFFSOAJUMG-SLHNCBLASA-N	negative	0	training
106	68-76-8	6235	C1CN1C2=CC(=O)C(=C(C2=O)N3CC3)N4CC4	Trenimon	PXSOHRWMIRDKMP-UHFFFAOYSA-N	cancer-other	1	training
107	72-33-3	6291	C[C@]12CC[C@H]3[C@H]([C@@H]1CC[C@]2(C#C)O)CCC4=C3C=CC(=C4)OC	Mestranol	IMSSROKUHAOUJS-MJCUULBUSA-N	negative	0	training
108	72-54-8	6294	C1=CC(=CC=C1C(C2=CC=C(C=C2)Cl)C(Cl)Cl)Cl	p,p'-DDD	AHJKRLASYNVKDZ-UHFFFAOYSA-N	cancer-liver	1	training
109	73-22-3	6305	C1=CC=C2C(=C1)C(=CN2)C[C@@H](C(=O)O)N	l-Tryptophan	QIVBCDIJIAJPQS-VIFPVBQESA-N	negative	0	training
110	74-31-7	6319	C1=CC=C(C=C1)NC2=CC=C(C=C2)NC3=CC=CC=C3	Diphenyl-p-phenylenediamine	UTGQNNCQYDRXCH-UHFFFAOYSA-N	negative	0	training
111	74-83-9	6323	CBr	Methyl bromide	GZUXJHMPEANEGY-UHFFFAOYSA-N	negative	0	training
112	76-01-7	6419	C(C(Cl)(Cl)Cl)(Cl)Cl	Pentachloroethane	BNIXVQGCZULYKV-UHFFFAOYSA-N	cancer-liver	1	training
113	76-25-5	6436	C[C@]12C[C@@H]([C@]3([C@H]([C@@H]1C[C@@H]4[C@]2(OC(O4)(C)C)C(=O)CO)CCC5=CC(=O)C=C[C@@]53C)F)O	Triamcinolone acetonide	YNDXUCZADRHECN-JNQJZLCISA-N	cancer-liver	1	training
114	77-06-5	6466	C[C@@]12[C@H](C=C[C@@]3([C@@H]1[C@@H]([C@]45[C@H]3CC[C@](C4)(C(=C)C5)O)C(=O)O)OC2=O)O	Gibberellic acid	IXORZMNAPKEEDV-OBDJNFEBSA-N	negative	0	training
115	77-46-3	6477	CC(=O)NC1=CC=C(C=C1)S(=O)(=O)C2=CC=C(C=C2)NC(=O)C	4,4'-Sulfonylbisacetanilide	AMTPYFGPPVFBBI-UHFFFAOYSA-N	cancer-other	1	training
116	77-47-4	6478	C1(=C(C(C(=C1Cl)Cl)(Cl)Cl)Cl)Cl	Hexachlorocyclopentadiene	VUNCWTMEJYMOOR-UHFFFAOYSA-N	negative	0	training
117	77-65-6	6488	CCC(CC)(C(=O)NC(=O)N)Br	Carbromal	OPNPQXLQERQBBV-UHFFFAOYSA-N	negative	0	training
118	77-83-8	6501	CCOC(=O)C1C(O1)(C)C2=CC=CC=C2	Ethyl methylphenylglycidate	LQKRYVGRPXFFAV-UHFFFAOYSA-N	negative	0	training
119	1330-78-5	6529	CC1=CC=C(C=C1)OP(=O)(OC2=CC=C(C=C2)C)OC3=CC=C(C=C3)C	Tricresyl phosphate	BOSMZFBHAYFUBJ-UHFFFAOYSA-N	negative	0	training
120	78-59-1	6544	CC1=CC(=O)CC(C1)(C)C	Isophorone	HJOVHMDZYOCNQW-UHFFFAOYSA-N	cancer-other	1	training
121	80-05-7	6623	CC(C)(C1=CC=C(C=C1)O)C2=CC=C(C=C2)O	Bisphenol A	IISBACLAFKSPIT-UHFFFAOYSA-N	negative	0	training
122	81-16-3	6670	C1=CC=C2C(=C1)C=CC(=C2S(=O)(=O)O)N	2-Naphthylamino,1-sulfonic acid	GWIAAIUASRVOIA-UHFFFAOYSA-N	negative	0	training
123	81-21-0	6673	C1C2C3CC4C(C3C1C5C2O5)O4	Dicyclopentadiene dioxide	BQQUFAMSJAKLNB-UHFFFAOYSA-N	negative	0	training
124	82-28-0	6702	CC1=C(C2=C(C=C1)C(=O)C3=CC=CC=C3C2=O)N	1-Amino-2-methylanthraquinone	ZLCUIOWQYBYEBG-UHFFFAOYSA-N	cancer-liver	1	training
125	82-68-8	6720	C1(=C(C(=C(C(=C1Cl)Cl)Cl)Cl)Cl)[N+](=O)[O-]	Pentachloronitrobenzene	LKPLKUMXSAEKID-UHFFFAOYSA-N	cancer-liver	1	training
126	83-59-0	6750	CCCOC(=O)C1C(CC2=CC3=C(C=C2C1C(=O)OCCC)OCO3)C	n-Propyl isome	UEKQGZQLUMSLNW-UHFFFAOYSA-N	negative	0	training
127	84-65-1	6780	C1=CC=C2C(=C1)C(=O)C3=CC=CC=C3C2=O	9,10-Anthraquinone	RZVHIXYEVGDQDX-UHFFFAOYSA-N	negative	0	training
128	86-29-3	6837	C1=CC=C(C=C1)C(C#N)C2=CC=CC=C2	Diphenylacetonitrile	NEBPTMCRLHKPOB-UHFFFAOYSA-N	negative	0	training
129	86-30-6	6838	C1=CC=C(C=C1)N(C2=CC=CC=C2)N=O	N-Nitrosodiphenylamine	UBUCNCOMADRQHX-UHFFFAOYSA-N	cancer-other	1	training
130	86-74-8	6854	C1=CC=C2C(=C1)C3=CC=CC=C3N2	Carbazole	UJOBWOGCFQCDNV-UHFFFAOYSA-N	cancer-liver	1	training
131	86-87-3	6862	C1=CC=C2C(=C1)C=CC=C2CC(=O)O	1-Naphthalene acetic acid	PRPINYUDVPFIRX-UHFFFAOYSA-N	negative	0	training
132	87-68-3	6901	C(=C(Cl)Cl)(C(=C(Cl)Cl)Cl)Cl	Hexachlorobutadiene	RWNKSTSCBHKHTB-UHFFFAOYSA-N	cancer-other	1	training
133	88-19-7	6924	CC1=CC=CC=C1S(=O)(=O)N	o-Toluenesulfonamide	YCMLQMDWSXFTIF-UHFFFAOYSA-N	cancer-other	1	training
134	88-26-6	6929	CC(C)(C)C1=CC(=CC(=C1O)C(C)(C)C)CO	di-tert-Butyl-4-hydroxymethyl phenol	HNURKXXMYARGAY-UHFFFAOYSA-N	negative	0	training
135	88-73-3	6945	C1=CC=C(C(=C1)[N+](=O)[O-])Cl	1-Chloro-2-nitrobenzene	BFCFYVKQTRLZHA-UHFFFAOYSA-N	cancer-liver	1	training
136	88-85-7	6950	CCC(C)C1=C(C(=CC(=C1)[N+](=O)[O-])[N+](=O)[O-])O	2-sec-Butyl-4,6-dinitrophenol	OWZPCEFYPSAJFR-UHFFFAOYSA-N	negative	0	training
137	90-94-8	7031	CN(C)C1=CC=C(C=C1)C(=O)C2=CC=C(C=C2)N(C)C	Michler's ketone	VVBLNCFGVYUYGU-UHFFFAOYSA-N	cancer-liver	1	training
138	91-59-8	7057	C1=CC=C2C=C(C=CC2=C1)N	2-Naphthylamine	JBIJLHTVPXGSAM-UHFFFAOYSA-N	cancer-liver	1	training
139	91-76-9	7064	C1=CC=C(C=C1)C2=NC(=NC(=N2)N)N	Benzoguanamine	GZVHEAJQGPRDLQ-UHFFFAOYSA-N	negative	0	training
140	91-93-0	7069	COC1=C(C=CC(=C1)C2=CC(=C(C=C2)N=C=O)OC)N=C=O	3,3'-Dimethoxybenzidine-4,4'-diisocyanate	QZWKEPYTBWZJJA-UHFFFAOYSA-N	cancer-other	1	training
141	91-94-1	7070	C1=CC(=C(C=C1C2=CC(=C(C=C2)N)Cl)Cl)N	3,3'-Dichlorobenzidine	HUWXDEQWWKGHRV-UHFFFAOYSA-N	cancer-other	1	training
142	92-52-4	7095	C1=CC=C(C=C1)C2=CC=CC=C2	Biphenyl	ZUOUZKKEUPVFJK-UHFFFAOYSA-N	negative	0	training
143	92-55-7	7097	CC(=O)OC(C1=CC=C(O1)[N+](=O)[O-])OC(=O)C	5-Nitro-2-furanmethanediol diacetate	HSXKWKJCZNRMJO-UHFFFAOYSA-N	negative	0	training
144	92-67-1	7102	C1=CC=C(C=C1)C2=CC=C(C=C2)N	4-Aminodiphenyl	DMVOXQPQNTYEKQ-UHFFFAOYSA-N	cancer-liver	1	training
145	92-69-3	7103	C1=CC=C(C=C1)C2=CC=C(C=C2)O	p-Phenylphenol	YXVFYQXJAXKLAK-UHFFFAOYSA-N	negative	0	training
146	92-84-2	7108	C1=CC=C2C(=C1)NC3=CC=CC=C3S2	Phenothiazine	WJFKNYWRSNBZNX-UHFFFAOYSA-N	negative	0	training
147	92-87-5	7111	C1=CC(=CC=C1C2=CC=C(C=C2)N)N	Benzidine	HFACYLZERDEVSX-UHFFFAOYSA-N	cancer-liver	1	training
148	93-46-9	7142	C1=CC=C2C=C(C=CC2=C1)NC3=CC=C(C=C3)NC4=CC5=CC=CC=C5C=C4	sym.-dibeta-Naphthyl-p-phenylenediamine	VETPHHXZEJAYOB-UHFFFAOYSA-N	negative	0	training
149	94-11-1	7173	CC(C)OC(=O)COC1=C(C=C(C=C1)Cl)Cl	2,4-Dichlorophenoxyacetic acid,isopropyl ester	WHOKDONDRZNCBC-UHFFFAOYSA-N	negative	0	training
150	94-26-8	7184	CCCCOC(=O)C1=CC=C(C=C1)O	Butyl p-hydroxybenzoate	QFOHBWFCKVYLES-UHFFFAOYSA-N	negative	0	training
151	94-36-0	7187	C1=CC=C(C=C1)C(=O)OOC(=O)C2=CC=CC=C2	Novadelox	OMPJBNCRMGITSC-UHFFFAOYSA-N	negative	0	training
152	94-52-0	7195	C1=CC2=C(C=C1[N+](=O)[O-])NC=N2	6-Nitrobenzimidazole	XPAZGLFMMUODDK-UHFFFAOYSA-N	cancer-liver	1	training
153	94-58-6	7197	CCCC1=CC2=C(C=C1)OCO2	Dihydrosafrole	MYEIDJPOUKASEC-UHFFFAOYSA-N	cancer-liver	1	training
154	94-80-4	7206	CCCCOC(=O)COC1=C(C=C(C=C1)Cl)Cl	2,4-Dichlorophenoxyacetic acid, n-butyl ester	UQMRAFJOBWOFNS-UHFFFAOYSA-N	negative	0	training
155	95-06-7	7216	CCN(CC)C(=S)SCC(=C)Cl	Sulfallate	XJCLWVXTCRQIDI-UHFFFAOYSA-N	cancer-other	1	training
156	95-14-7	7220	C1=CC2=NNN=C2C=C1	1H-Benzotriazole	QRUDEWIWKLJBPS-UHFFFAOYSA-N	cancer-other	1	training
157	95-33-0	7232	C1CCC(CC1)NSC2=NC3=CC=CC=C3S2	N-Cyclohexyl-2-benzothiazole sulfenamide	DEQZTKGFXNUBJL-UHFFFAOYSA-N	negative	0	training
158	95-79-4	7260	CC1=C(C=C(C=C1)Cl)N	5-Chloro-o-toluidine	WRZOMWDJOLIVQP-UHFFFAOYSA-N	cancer-liver	1	training
159	96-09-3	7276	C1C(O1)C2=CC=CC=C2	Styrene oxide	AWMVMTVKBNGEAK-UHFFFAOYSA-N	cancer-other	1	training
160	96-69-5	7308	CC1=CC(=C(C=C1SC2=CC(=C(C=C2C)O)C(C)(C)C)C(C)(C)C)O	4,4'-Thiobis(6-tert-butyl-m-cresol)	HXIQYSLFEXIOAV-UHFFFAOYSA-N	negative	0	training
161	97-16-5	7327	C1=CC=C(C=C1)S(=O)(=O)OC2=C(C=C(C=C2)Cl)Cl	2,4-Dichlorophenylbenzene sulfonate	OZFAFGSSMRRTDW-UHFFFAOYSA-N	negative	0	training
162	97-56-3	7340	CC1=CC=CC=C1N=NC2=CC(=C(C=C2)N)C	o-Aminoazotoluene	PFRYFZZSECNQOL-UHFFFAOYSA-N	cancer-liver	1	training
163	97-74-5	7347	CN(C)C(=S)SC(=S)N(C)C	Tetramethylthiuram monosulfide	REQPQFUJGGOFQL-UHFFFAOYSA-N	negative	0	training
164	98-01-1	7362	C1=COC(=C1)C=O	Furfural	HYBBIBNJHNGZAN-UHFFFAOYSA-N	cancer-liver	1	training
165	99-30-9	7430	C1=C(C=C(C(=C1Cl)N)Cl)[N+](=O)[O-]	2,6-Dichloro-4-nitroaniline	BIXZHMJUSMUDOQ-UHFFFAOYSA-N	negative	0	training
166	99-55-8	7444	CC1=C(C=C(C=C1)[N+](=O)[O-])N	5-Nitro-o-toluidine	DSBIJCMXAIKKKI-UHFFFAOYSA-N	cancer-liver	1	training
167	99-59-2	7447	COC1=C(C=C(C=C1)[N+](=O)[O-])N	5-Nitro-o-anisidine	NIPDVSLAMPAWTP-UHFFFAOYSA-N	cancer-liver	1	training
168	100-40-3	7499	C=CC1CCC=CC1	4-Vinylcyclohexene	BBDKZWKEPDTENS-UHFFFAOYSA-N	cancer-other	1	training
169	101-25-7	7549	C1N2CN(CN1CN(C2)N=O)N=O	N,N-Dinitrosopentamethylenetetramine	MWRWFPQBGSZWNV-UHFFFAOYSA-N	negative	0	training
170	101-61-1	7567	CN(C)C1=CC=C(C=C1)CC2=CC=C(C=C2)N(C)C	4,4'-Methylenebis(N,N-dimethyl) benzenamine	JNRLEMMIVRBKJE-UHFFFAOYSA-N	cancer-liver	1	training
171	101-73-5	7574	CC(C)OC1=CC=C(C=C1)NC2=CC=CC=C2	p-Isopropoxydiphenylamine	CVVFFUKULYKOJR-UHFFFAOYSA-N	negative	0	training
172	101-79-1	7578	C1=CC(=CC=C1N)OC2=CC=C(C=C2)Cl	4-Chloro-4'-aminodiphenylether	YTISFYMPVILQRL-UHFFFAOYSA-N	cancer-liver	1	training
173	101-80-4	7579	C1=CC(=CC=C1N)OC2=CC=C(C=C2)N	4,4'-Oxydianiline	HLBLWEWZXPIGSM-UHFFFAOYSA-N	cancer-liver	1	training
174	102-09-0	7597	C1=CC=C(C=C1)OC(=O)OC2=CC=CC=C2	Diphenylcarbonate	ROORDVPLFPIABK-UHFFFAOYSA-N	negative	0	training
175	102-77-2	7619	C1COCCN1SC2=NC3=CC=CC=C3S2	N-Oxydiethylenebenzothiazole-2-sulfenamide	MHKLKWCYGIBEQF-UHFFFAOYSA-N	negative	0	training
176	103-23-1	7641	CCCCC(CC)COC(=O)CCCCC(=O)OCC(CC)CCCC	di(2-Ethylhexyl)adipate	SAOKZLXYCUGLFA-UHFFFAOYSA-N	cancer-liver	1	training
177	103-72-0	7673	C1=CC=C(C=C1)N=C=S	Phenyl isothiocyanate	QKFJKGMPGYROCL-UHFFFAOYSA-N	negative	0	training
178	106-87-6	7833	C1CC2C(O2)CC1C3CO3	1-Ethyleneoxy-3,4-epoxycyclohexane	OECTYKWYRCHAKR-UHFFFAOYSA-N	negative	0	training
179	108-78-1	7955	C1(=NC(=NC(=N1)N)N)N	Melamine	JDSHMPZPIAZGSV-UHFFFAOYSA-N	cancer-other	1	training
180	114-83-0	8247	CC(=O)NNC1=CC=CC=C1	1-Acetyl-2-phenylhydrazine	UICBCXONCUFSOI-UHFFFAOYSA-N	cancer-liver	1	training
181	115-28-6	8266	C1(C(C2(C(=C(C1(C2(Cl)Cl)Cl)Cl)Cl)Cl)C(=O)O)C(=O)O	Chlorendic acid	DJKGDNKYTKCJKD-UHFFFAOYSA-N	cancer-liver	1	training
182	115-32-2	8268	C1=CC(=CC=C1C(C2=CC=C(C=C2)Cl)(C(Cl)(Cl)Cl)O)Cl	Dicofol	UOAMTSKGCBMZTC-UHFFFAOYSA-N	cancer-liver	1	training
183	115-96-8	8295	C(CCl)OP(=O)(OCCCl)OCCCl	Tris(2-chloroethyl)phosphate	HQUQLFOMPYWACS-UHFFFAOYSA-N	cancer-other	1	training
184	116-29-0	8305	C1=CC(=CC=C1S(=O)(=O)C2=CC(=C(C=C2Cl)Cl)Cl)Cl	2,4,5,4'-Tetrachlorodiphenyl sulfone	MLGCXEBRWGEOQX-UHFFFAOYSA-N	negative	0	training
185	117-79-3	8341	C1=CC=C2C(=C1)C(=O)C3=C(C2=O)C=C(C=C3)N	2-Aminoanthraquinone	XOGPDSATLSAZEK-UHFFFAOYSA-N	cancer-liver	1	training
186	117-80-6	8342	C1=CC=C2C(=C1)C(=O)C(=C(C2=O)Cl)Cl	2,3-Dichloro-1,4-naphthoquinone	SVPKNMBRVBMTLB-UHFFFAOYSA-N	negative	0	training
187	117-81-7	8343	CCCCC(CC)COC(=O)C1=CC=CC=C1C(=O)OCC(CC)CCCC	di(2-Ethylhexyl)phthalate	BJQHLKABXJIVAM-UHFFFAOYSA-N	cancer-liver	1	training
188	118-74-1	8370	C1(=C(C(=C(C(=C1Cl)Cl)Cl)Cl)Cl)Cl	Hexachlorobenzene	CKAPSXZOOQJIBF-UHFFFAOYSA-N	cancer-liver	1	training
189	119-38-0	8393	CC1=NN(C(=C1)OC(=O)N(C)C)C(C)C	1-Isopropyl-3-methyl-S-pyrazolyldimethyl carbamate	RNNBHZYEKNHLKT-UHFFFAOYSA-N	negative	0	training
190	119-53-9	8400	C1=CC=C(C=C1)C(C(=O)C2=CC=CC=C2)O	Benzoin	ISAOCJYIOMOJEB-UHFFFAOYSA-N	negative	0	training
191	120-32-1	8425	C1=CC=C(C=C1)CC2=C(C=CC(=C2)Cl)O	o-Benzyl-p-chlorophenol	NCKMMSIFQUPKCK-UHFFFAOYSA-N	cancer-other	1	training
192	120-61-6	8441	COC(=O)C1=CC=C(C=C1)C(=O)OC	Dimethyl terephthalate	WOZVHXUHUFLZGK-UHFFFAOYSA-N	negative	0	training
193	120-62-7	8442	CCCCCCCCS(=O)C(C)CC1=CC2=C(C=C1)OCO2	Piperonyl sulfoxide	ATTZFSUZZUNHBP-UHFFFAOYSA-N	cancer-liver	1	training
194	120-71-8	8445	CC1=CC(=C(C=C1)OC)N	p-Cresidine	WXWCDTXEKCVRRO-UHFFFAOYSA-N	cancer-liver	1	training
195	120-78-5	8447	C1=CC=C2C(=C1)N=C(S2)SSC3=NC4=CC=CC=C4S3	Benzothiazyl disulfide	AFZSMODLJJCVPP-UHFFFAOYSA-N	negative	0	training
196	121-14-2	8461	CC1=C(C=C(C=C1)[N+](=O)[O-])[N+](=O)[O-]	2,4-Dinitrotoluene, practical grade	RMBFBMJGBANMMK-UHFFFAOYSA-N	negative	0	training
197	129-43-1	8512	C1=CC=C2C(=C1)C(=O)C3=C(C2=O)C(=CC=C3)O	1-Hydroxyanthraquinone	BTLXPCBPYBNQNR-UHFFFAOYSA-N	cancer-liver	1	training
198	131-01-1	8550	CO[C@H]1[C@@H](C[C@@H]2CN3CCC4=C([C@H]3C[C@@H]2[C@@H]1C(=O)OC)NC5=CC=CC=C45)OC(=O)C6=CC(=C(C(=C6)OC)OC)OC	Deserpidine	CVBMAZKKCSYWQR-WCGOZPBSSA-N	negative	0	training
199	131-17-9	8560	C=CCOC(=O)C1=CC=CC=C1C(=O)OCC=C	Diallyl phthalate	QUDWYFHPNIMBFC-UHFFFAOYSA-N	cancer-other	1	training
200	133-06-2	8606	C1C=CCC2C1C(=O)N(C2=O)SC(Cl)(Cl)Cl	Captan	LDVVMCZRFWMZSG-UHFFFAOYSA-N	cancer-other	1	training
201	133-07-3	8607	C1=CC=C2C(=C1)C(=O)N(C2=O)SC(Cl)(Cl)Cl	N-(Trichloromethylthio)phthalimide	HKIOYBQGHSTUDB-UHFFFAOYSA-N	cancer-other	1	training
202	133-90-4	8630	C1=C(C=C(C(=C1C(=O)O)Cl)N)Cl	Chloramben	HSSBORCLYSCBJR-UHFFFAOYSA-N	cancer-liver	1	training
203	135-23-9	8667	CN(C)CCN(CC1=CC=CS1)C2=CC=CC=N2.Cl	Methapyrilene.HCl	BONORRGKLJBGRV-UHFFFAOYSA-N	cancer-liver	1	training
204	136-40-3	8691	C1=CC=C(C=C1)N=NC2=C(N=C(C=C2)N)N.Cl	Phenazopyridine.HCl	QQBPIHBUCMDKFG-UHFFFAOYSA-N	cancer-liver	1	training
205	139-13-9	8758	C(C(=O)O)N(CC(=O)O)CC(=O)O	Nitrilotriacetic acid	MGFYIUFZLHCRTH-UHFFFAOYSA-N	cancer-other	1	training
206	139-94-6	8776	CCNC(=O)NC1=NC=C(S1)[N+](=O)[O-]	Nithiazide	FQSUTLQHSDLLAN-UHFFFAOYSA-N	cancer-liver	1	training
207	150-68-5	8800	CN(C)C(=O)NC1=CC=C(C=C1)Cl	3-(p-Chlorophenyl)-1,1-dimethylurea	BMLIZLVNXIYGCK-UHFFFAOYSA-N	cancer-liver	1	training
208	140-57-8	8809	CC(COC1=CC=C(C=C1)C(C)(C)C)OS(=O)OCCCl	Aramite	YKFRAOGHWKADFJ-UHFFFAOYSA-N	cancer-liver	1	training
209	156-10-5	9074	C1=CC=C(C=C1)NC2=CC=C(C=C2)N=O	p-Nitrosodiphenylamine	OIJHFHYPXWSVPF-UHFFFAOYSA-N	cancer-liver	1	training
210	262-12-4	9216	C1=CC=C2C(=C1)OC3=CC=CC=C3O2	Dibenzo-p-dioxin	NFBOHOGPQUYFRF-UHFFFAOYSA-N	negative	0	training
211	271-89-6	9223	C1=CC=C2C(=C1)C=CO2	Benzofuran	IANQTJSKSUMEQM-UHFFFAOYSA-N	cancer-liver	1	training
212	297-76-7	9270	CC(=O)O[C@H]1CC[C@@H]2[C@H]3CC[C@]4([C@H]([C@@H]3CCC2=C1)CC[C@]4(C#C)OC(=O)C)C	Ethynodiol diacetate	ONKUMRGIYFNPJW-KIEAKMPYSA-N	negative	0	training
213	297-78-9	9271	C12C(C(OC1Cl)Cl)C3(C(=C(C2(C3(Cl)Cl)Cl)Cl)Cl)Cl	Telodrin	LRWHHSXTGZSMSN-UHFFFAOYSA-N	negative	0	training
214	302-22-7	9324	CC(=O)[C@]1(CC[C@@H]2[C@@]1(CC[C@H]3[C@H]2C=C(C4=CC(=O)CC[C@]34C)Cl)C)OC(=O)C	Chlormadinone acetate	QMBJSIBWORFWQT-DFXBJWIESA-N	negative	0	training
215	315-18-4	9414	CC1=CC(=CC(=C1N(C)C)C)OC(=O)NC	Mexacarbate	YNEVBPNZHBAYOA-UHFFFAOYSA-N	negative	0	training
216	315-22-0	9415	C[C@H]1C(=O)O[C@@H]2CCN3[C@@H]2C(=CC3)COC(=O)[C@]([C@]1(C)O)(C)O	Monocrotaline	QVCMHGGNRFRMAD-XFGHUUIASA-N	cancer-liver	1	training
217	320-67-2	9444	C1=NC(=NC(=O)N1[C@H]2[C@@H]([C@@H]([C@H](O2)CO)O)O)N	5-Azacytidine	NMUSYJAQQFHJEW-KVTDHHQDSA-N	cancer-other	1	training
218	324-93-6	9462	C1=CC(=CC=C1C2=CC=C(C=C2)F)N	4'-Fluoro-4-aminodiphenyl	HTRVALPKPVGOSZ-UHFFFAOYSA-N	cancer-liver	1	training
219	363-17-7	9690	C1C2=CC=CC=C2C3=C1C=C(C=C3)NC(=O)C(F)(F)F	N-(2-Fluorenyl)-2,2,2-trifluoroacetamide	XPHPBNGAXWJHHP-UHFFFAOYSA-N	cancer-liver	1	training
220	398-32-3	9812	CC(=O)NC1=CC=C(C=C1)C2=CC=C(C=C2)F	N-4-(4'-Fluorobiphenyl)acetamide	JORMZLCKCZMVJM-UHFFFAOYSA-N	cancer-other	1	training
221	474-25-9	10133	C[C@H](CCC(=O)O)[C@H]1CC[C@@H]2[C@@]1(CC[C@H]3[C@H]2[C@@H](C[C@H]4[C@@]3(CC[C@H](C4)O)C)O)C	Chenodeoxycholic acid	RUDATBOHQWOJDD-BSWAIDMHSA-N	negative	0	training
222	493-78-7	10306	CN(C)CCN(CC1=CC=CS1)C2=CC=CC=C2	Methaphenilene	LDYJXVUOVPVZKA-UHFFFAOYSA-N	negative	0	training
223	509-14-8	10509	C([N+](=O)[O-])([N+](=O)[O-])([N+](=O)[O-])[N+](=O)[O-]	Tetranitromethane	NYTOUQBROMCLBJ-UHFFFAOYSA-N	cancer-other	1	training
224	510-15-6	10522	CCOC(=O)C(C1=CC=C(C=C1)Cl)(C2=CC=C(C=C2)Cl)O	Chlorobenzilate	RAPBNVDSDCTNRC-UHFFFAOYSA-N	cancer-liver	1	training
225	531-82-8	10753	CC(=O)NC1=NC(=CS1)C2=CC=C(O2)[N+](=O)[O-]	N-[4-(5-Nitro-2-furyl)-2-thiazolyl]acetamide	GYRMPDLIHUXUIG-UHFFFAOYSA-N	cancer-other	1	training
226	538-23-8	10850	CCCCCCCC(=O)OCC(COC(=O)CCCCCCC)OC(=O)CCCCCCC	Tricaprylin	VLPFTAMPNXLGLX-UHFFFAOYSA-N	negative	0	training
227	538-41-0	10855	C1=CC(=CC=C1N)N=NC2=CC=C(C=C2)N	4,4'-Diaminoazobenzene	KQIKKETXZQDHGE-UHFFFAOYSA-N	negative	0	training
228	569-57-3	11289	COC1=CC=C(C=C1)C(=C(C2=CC=C(C=C2)OC)Cl)C3=CC=C(C=C3)OC	Tace	BFPSDSIWYFKGBC-UHFFFAOYSA-N	negative	0	training
229	602-87-9	11769	C1CC2=CC=C(C3=CC=CC1=C23)[N+](=O)[O-]	5-Nitroacenaphthene	CUARLQDWYSRQDF-UHFFFAOYSA-N	cancer-liver	1	training
230	606-20-2	11813	CC1=C(C=CC=C1[N+](=O)[O-])[N+](=O)[O-]	2,6-Dinitrotoluene	XTRDKALNCIHHNI-UHFFFAOYSA-N	cancer-liver	1	training
231	607-35-2	11830	C1=CC2=C(C(=C1)[N+](=O)[O-])N=CC=C2	8-Nitroquinoline	OQHHSGRZCKGLCY-UHFFFAOYSA-N	cancer-other	1	training
232	613-50-3	11945	C1=CC2=C(C=CC(=C2)[N+](=O)[O-])N=C1	6-Nitroquinoline	SMHPLBXIVNQFBA-UHFFFAOYSA-N	negative	0	training
233	625-89-8	12267	C(C(F)(F)F)N(CC(F)(F)F)N=O	N-Nitrosobis(2,2,2-trifluoroethyl) amine	YUEXLPFBTMPXCY-UHFFFAOYSA-N	negative	0	training
234	628-36-4	12342	C(=O)NNC=O	1,2-Diformylhydrazine	POVXOWVFLAAVBH-UHFFFAOYSA-N	cancer-other	1	training
235	684-93-5	12699	CN(C(=O)N)N=O	N-Nitroso-N-methylurea	ZRKWMRDKSOPRRS-UHFFFAOYSA-N	cancer-other	1	training
236	756-79-6	12958	COP(=O)(C)OC	Dimethyl methylphosphonate	VONWDASPFIQPDY-UHFFFAOYSA-N	cancer-other	1	training
237	759-73-9	12967	CCN(C(=O)N)N=O	1-Ethyl-1-nitrosourea	FUSGACRLAFQQRL-UHFFFAOYSA-N	cancer-other	1	training
238	828-00-2	13232	CC1CC(OC(O1)C)OC(=O)C	Dimethoxane	PHMNXPYGVPEQSJ-UHFFFAOYSA-N	cancer-liver	1	training
239	838-88-0	13283	CC1=C(C=CC(=C1)CC2=CC(=C(C=C2)N)C)N	4,4'-Methylene-bis(2-methylaniline)	WECDUOXQLAIPQW-UHFFFAOYSA-N	cancer-liver	1	training
240	842-00-2	13296	CCS(=O)(=O)C1=CC=C(C2=CC=CC=C21)S(=O)(=O)N	4-Ethylsulphonylnaphthalene-1-sulfonamide	BLQOLXMZXQXGOL-UHFFFAOYSA-N	cancer-other	1	training
241	924-16-3	13542	CCCCN(CCCC)N=O	Nitrosodibutylamine	YGJHZCLPZAZIHH-UHFFFAOYSA-N	cancer-liver	1	training
242	932-83-2	13613	C1CCCN(CC1)N=O	N-Nitrosohexamethyleneimine	UZMVSVHUTOAPTD-UHFFFAOYSA-N	cancer-liver	1	training
243	950-37-8	13709	COC1=NN(C(=O)S1)CSP(=S)(OC)OC	Methidathion	MEBQXILRKZHVCX-UHFFFAOYSA-N	cancer-liver	1	training
244	1083-57-4	14130	CCOC1=CC=C(C=C1)NC(=O)CC(C)O	3-Hydroxy-p-butyrophenetidide	LIAWQASKBFCRNR-UHFFFAOYSA-N	cancer-other	1	training
245	1095-90-5	14184	CCC(=O)C(CC(C)N(C)C)(C1=CC=CC=C1)C2=CC=CC=C2.Cl	6-Dimethylamino-4,4-diphenyl-3-heptanone.HCl	FJQXCDYVZAHXNS-UHFFFAOYSA-N	negative	0	training
246	1114-71-2	14215	CCCCN(CC)C(=O)SCCC	Propyl N-ethyl-N-butylthiocarbamate	SGEJQUSYQTVSIU-UHFFFAOYSA-N	negative	0	training
247	1120-71-4	14264	C1COS(=O)(=O)C1	Propane sultone	FSSPGSAQUIYDCN-UHFFFAOYSA-N	cancer-other	1	training
248	853-23-6	14709	CC(=O)O[C@H]1CC[C@@]2([C@H]3CC[C@]4([C@H]([C@@H]3CC=C2C1)CCC4=O)C)C	Dehydroepiandrosterone acetate	NCMZQTLCXHGLOK-ZKHIMWLXSA-N	cancer-liver	1	training
249	1420-04-8	14992	C1=CC(=C(C=C1[N+](=O)[O-])Cl)NC(=O)C2=C(C=CC(=C2)Cl)O.C(CO)N	Clonitralid	XYCDHXSQODHSLG-UHFFFAOYSA-N	negative	0	training
250	1465-25-4	15106	C1=CC=C2C(=C1)C=CC=C2NCCN.Cl.Cl	N-(1-Naphthyl)ethylenediamine.2HCl	MZNYWPRCVDMOJG-UHFFFAOYSA-N	negative	0	training
251	1634-78-2	15415	CCOC(=O)CC(C(=O)OCC)SP(=O)(OC)OC	Malaoxon	WSORODGWGUUOBO-UHFFFAOYSA-N	negative	0	training
252	1643-20-5	15433	CCCCCCCCCCCC[N+](C)(C)[O-]	N,N-Dimethyldodecylamine-N-oxide	SYELZBGXAIXKHU-UHFFFAOYSA-N	negative	0	training
253	1746-01-6	15625	C1=C2C(=CC(=C1Cl)Cl)OC3=CC(=C(C=C3O2)Cl)Cl	2,3,7,8-Tetrachlorodibenzo-p-dioxin	HGUFODBRKLSHSI-UHFFFAOYSA-N	cancer-liver	1	training
254	1777-84-0	15685	CCOC1=C(C=C(C=C1)NC(=O)C)[N+](=O)[O-]	3-Nitro-p-acetophenetide	UOIPFPSGIAWJAQ-UHFFFAOYSA-N	cancer-liver	1	training
255	1836-75-5	15787	C1=CC(=CC=C1[N+](=O)[O-])OC2=C(C=C(C=C2)Cl)Cl	Nitrofen	XITQUSLLOSKDTB-UHFFFAOYSA-N	cancer-liver	1	training
256	1897-45-6	15910	C(#N)C1=C(C(=C(C(=C1Cl)Cl)Cl)C#N)Cl	Chlorothalonil	CRQQGFGUEAVUIL-UHFFFAOYSA-N	cancer-other	1	training
257	1955-45-9	16059	CC1(COC1=O)C	Pivalolactone	ULKFLOVGORAZDI-UHFFFAOYSA-N	cancer-other	1	training
258	2104-09-8	16420	C1=CC(=CC=C1C2=CSC(=N2)N)[N+](=O)[O-]	2-Amino-4-(p-nitrophenyl)thiazole	RIKJWJIWXCUKQV-UHFFFAOYSA-N	cancer-other	1	training
259	2122-86-3	16463	C1=C(OC(=C1)[N+](=O)[O-])C2=NNC(=O)O2	5-(5-Nitro-2-furyl)-1,3,4-oxadiazole-2-ol	OWDANLZJJOCPBK-UHFFFAOYSA-N	cancer-other	1	training
260	2163-79-3	16556	CN(C)C(=O)NC1CC2CC1C3C2CCC3	3-(Hexahydro-4,7-methanoindan-5-yl)-1,1-dimethylurea	YGLMVCVJLXREAK-UHFFFAOYSA-N	negative	0	training
261	2227-13-6	16685	C1=CC(=CC=C1SC2=CC(=C(C=C2Cl)Cl)Cl)Cl	p-Chlorophenyl-2,4,5-trichlorophenyl sulfide	QUWSDLYBOVGOCW-UHFFFAOYSA-N	negative	0	training
262	2243-62-1	16720	C1=CC2=C(C=CC=C2N)C(=C1)N	1,5-Naphthalenediamine	KQSABULTKYLFEV-UHFFFAOYSA-N	cancer-liver	1	training
263	2385-85-5	16945	C12(C3(C4(C5(C3(C(C1(C5(C2(C4(Cl)Cl)Cl)Cl)Cl)(Cl)Cl)Cl)Cl)Cl)Cl)Cl	Mirex	GVYLCNUFSHDAAW-UHFFFAOYSA-N	cancer-liver	1	training
264	2425-06-1	17038	C1C=CCC2C1C(=O)N(C2=O)SC(C(Cl)Cl)(Cl)Cl	Captafol	JHRWWRDRBPCWTF-UHFFFAOYSA-N	cancer-liver	1	training
265	2432-99-7	17083	C(CCCCCN)CCCCC(=O)O	11-Aminoundecanoic acid	GUOSQNAUYHMCRU-UHFFFAOYSA-N	cancer-liver	1	training
266	2438-88-2	17107	COC1=C(C(=C(C(=C1Cl)Cl)[N+](=O)[O-])Cl)Cl	2,3,5,6-Tetrachloro-4-nitroanisole	BGPPUXMKKQMWLV-UHFFFAOYSA-N	negative	0	training
267	2439-10-3	17110	CCCCCCCCCCCCN=C(N)N.CC(=O)O	n-Dodecylguanidine acetate	YIKWKLYQRFRGPM-UHFFFAOYSA-N	negative	0	training
268	2465-27-2	17170	CN(C)C1=CC=C(C=C1)C(=N)C2=CC=C(C=C2)N(C)C.Cl	Auramine-O	KSCQDDRPFHTIRL-UHFFFAOYSA-N	cancer-liver	1	training
269	2578-75-8	17405	CC(=O)NC1=NN=C(S1)C2=CC=C(O2)[N+](=O)[O-]	N-[5-(5-Nitro-2-furyl)-1,3,4-thiadiazol-2-yl]acetamide	KGVQFUIYBAPYSK-UHFFFAOYSA-N	cancer-liver	1	training
270	2698-41-1	17604	C1=CC=C(C(=C1)C=C(C#N)C#N)Cl	o-Chlorobenzalmalonitrile	JJNZXLAFIPKXIG-UHFFFAOYSA-N	negative	0	training
271	3096-50-2	18355	CC(=O)NC1=CC2=C(C=C1)C3=CC=CC=C3C2=O	N-(9-Oxo-2-fluorenyl)acetamide	PYGNVSDRIIPHQP-UHFFFAOYSA-N	cancer-liver	1	training
272	3012-65-5	18954	C(C(=O)[O-])C(CC(=O)[O-])(C(=O)[O-])O.[NH4+].[NH4+].[NH4+]	Ammonium citrate	YWYZEGXAUVWDED-UHFFFAOYSA-N	negative	0	training
273	3544-23-8	19062	COC1=C(C=CC(=C1)N=NC2=CC=CC=C2)N	3-Methoxy-4-aminoazobenzene	BQDAFHDHPLPCLC-UHFFFAOYSA-N	cancer-liver	1	training
274	3693-22-9	19405	C1=CC=C2C(=C1)C3=C(O2)C=CC(=C3)N	2-Aminodiphenylene oxide	FFYZMBQLAYDJIG-UHFFFAOYSA-N	cancer-liver	1	training
275	3771-19-5	19592	CC(C)(C(=O)O)OC1=CC=C(C=C1)C2CCCC3=CC=CC=C23	Nafenopin	XJGBDJOMWKAZJS-UHFFFAOYSA-N	cancer-liver	1	training
276	3817-11-6	19665	CCCCN(CCCCO)N=O	N-Butyl-N-(4-hydroxybutyl)nitrosamine	DIKPQFXYECAYPC-UHFFFAOYSA-N	cancer-other	1	training
277	4075-79-0	19998	CC(=O)NC1=CC=C(C=C1)C2=CC=CC=C2	4-Acetylaminobiphenyl	SVLDILRDQOVJED-UHFFFAOYSA-N	cancer-other	1	training
278	4463-22-3	20527	CC(=O)N(C1=CC=C(C=C1)C2=CC=CC=C2)O	3-Hydroxy-4-acetylaminobiphenyl	UNHSJQXRZCIATF-UHFFFAOYSA-N	negative	0	training
279	4812-22-0	20950	CCC=C(CC)[N+](=O)[O-]	3-Nitro-3-hexene	LDKGEUAGEISBIX-UHFFFAOYSA-N	cancer-other	1	training
280	5208-87-7	21268	C=CC(C1=CC2=C(C=C1)OCO2)O	1'-Hydroxysafrole	VVBJNJFYBCLUAH-UHFFFAOYSA-N	cancer-liver	1	training
281	531-06-6	21563	CN(C)CCN(CC1=CC=CO1)C2=CC=CC=N2	Methafurylene	LUQHAHRMUPOTQK-UHFFFAOYSA-N	negative	0	training
282	5800-19-1	22047	CC1=CC2=C(C=C1)SC3=CC=CC=C3N=C2N4CCN(CC4)C	Metiapine	IOEPXYJOHIZYGQ-UHFFFAOYSA-N	negative	0	training
283	5834-17-3	22086	COC1=C(C=C2C(=C1)C3=CC=CC=C3O2)N	2-Methoxy-3-aminodibenzofuran	SGQVWNYSHWQNOS-UHFFFAOYSA-N	cancer-other	1	training
284	6120-10-1	22499	CC1=CC(=CC(=C1N(C)C)C)O	4-Dimethylamino-3,5-xylenol	GZPBVLUEICLBOA-UHFFFAOYSA-N	negative	0	training
285	6385-58-6	22882	C1=C(C=C(C(=C1SC2=C(C(=CC(=C2)Cl)Cl)[O-])[O-])Cl)Cl.[Na+].[Na+]	Sodium bithionolate	FNYZFZRGBBCWBI-UHFFFAOYSA-L	negative	0	training
286	7227-91-0	23654	CN(C)N=NC1=CC=CC=C1	1-Phenyl-3,3-dimethyltriazene	LLROQAGEAVDYFP-UHFFFAOYSA-N	cancer-other	1	training
287	7411-49-6	23892	C1=CC(=C(C=C1C2=CC(=C(C=C2)N)N)N)N.Cl.Cl.Cl.Cl	3,3',4,4'-Tetraaminobiphenyl.4HCl	KJDSORYAHBAGPP-UHFFFAOYSA-N	cancer-liver	1	training
288	7422-80-2	23902	CCCCN(CCCC)N	1,1-di-n-Butylhydrazine	DJTIANXYHUNHQV-UHFFFAOYSA-N	cancer-liver	1	training
289	25168-26-7	24678	CC(C)CCCCCOC(=O)COC1=C(C=C(C=C1)Cl)Cl	2,4-Dichlorophenoxyacetic acid, isooctyl ester	BBPLSOGERZQYQC-UHFFFAOYSA-N	negative	0	training
290	122-42-9	24685	CC(C)OC(=O)NC1=CC=CC=C1	Isopropyl-N-phenyl carbamate	VXPLXMJHHKHSOA-UHFFFAOYSA-N	negative	0	training
291	122-20-3	24730	CC(CN(CC(C)O)CC(C)O)O	Tris(2-hydroxypropyl)amine	SLINHMUFWFWBMU-UHFFFAOYSA-N	negative	0	training
292	10473-70-8	25301	C#CC(C1=CC=CC=C1)(C2=CC=C(C=C2)Cl)OC(=O)N	1-(4-Chlorophenyl)-1-phenyl-2-propynyl carbamate	SXHWIUYWGJFLKB-UHFFFAOYSA-N	cancer-other	1	training
293	17026-81-2	28207	CCOC1=C(C=C(C=C1)NC(=O)C)N	3-Amino-4-ethoxyacetanilide	XTXFAVHDQCHWCS-UHFFFAOYSA-N	cancer-other	1	training
294	17608-59-2	28638	CC(C(C1=CC=CC=C1)O)N(C)N=O	N-Nitrosoephedrine	ZVTOLKAVCZXHFM-UHFFFAOYSA-N	cancer-liver	1	training
295	18523-69-8	29118	CC(=NNC1=NC(=CS1)C2=CC=C(O2)[N+](=O)[O-])C	Acetone[4-(5-nitro-2-furyl)-2-thiazolyl] hydrazone	UCTPNCITVKAWEJ-UHFFFAOYSA-N	cancer-other	1	training
296	18883-66-4	29327	CN(C(=O)N[C@@H]1[C@H]([C@@H]([C@H](O[C@@H]1O)CO)O)O)N=O	Streptozotocin	ZSJLQEPLLKMAKR-GKHCUFPYSA-N	cancer-other	1	training
297	20917-49-1	30360	C1CCCN(CCC1)N=O	Nitrosoheptamethyleneimine	RCFKQVLHWYOSFF-UHFFFAOYSA-N	cancer-liver	1	training
298	21340-68-1	30602	CC(C)(C(=O)OC)OC1=CC=C(C=C1)C2=CC=C(C=C2)Cl	Methyl clofenapate	CLJAWWBXVXWHFD-UHFFFAOYSA-N	cancer-liver	1	training
299	21416-87-5	30623	CC(CN1CC(=O)NC(=O)C1)N2CC(=O)NC(=O)C2	ICRF-159	BMKDZUISNHGIBY-UHFFFAOYSA-N	cancer-other	1	training
300	21498-08-8	30667	CC(C1=NCCN1)OC2=C(C=CC=C2Cl)Cl.Cl	Lofexidine.HCl	DWWHMKBNNNZGHF-UHFFFAOYSA-N	negative	0	training
301	21626-89-1	30717	C1C2=CC=CC=C2C(=O)N3N1C(=O)C4=CC=CC=C4C3	Diftalone	CXSJGNHRBWJXEA-UHFFFAOYSA-N	cancer-liver	1	training
302	21884-44-6	30840	CC1=CC(=C2C(=C1O)C(=O)C34C5C6C(C3C(=O)C7=C(C8=C(C=C(C(=C8C(=O)C67C(C5O)C(=O)C4=C2O)O)C)O)O)O)O	Luteoskyrin	FAZDYVMEXQHRLI-UHFFFAOYSA-N	cancer-liver	1	training
303	21928-82-5	30861	CN(C1=NC=NC2=C1NC=N2)N=O	(N-6)-(Methylnitroso)adenosine	HTWGDSKVENTDTB-UHFFFAOYSA-N	cancer-other	1	training
304	122-60-1	31217	C1C(O1)COC2=CC=CC=C2	Phenylglycidyl ether	FQYUMYWMJTYZTK-UHFFFAOYSA-N	cancer-other	1	training
305	122-66-7	31222	C1=CC=C(C=C1)NNC2=CC=CC=C2	Hydrazobenzene	YBQZXXMEJHZYMB-UHFFFAOYSA-N	cancer-liver	1	training
306	126-72-7	31356	C(C(CBr)Br)OP(=O)(OCC(CBr)Br)OCC(CBr)Br	Tris(2,3-dibromopropyl)phosphate	PQYJRMFWJJONBO-UHFFFAOYSA-N	cancer-liver	1	training
307	128-37-0	31404	CC1=CC(=C(C(=C1)C(C)(C)C)O)C(C)(C)C	Butylated hydroxytoluene	NLZUEZXRPGMBCV-UHFFFAOYSA-N	cancer-liver	1	training
308	129-15-7	31426	CC1=C(C2=C(C=C1)C(=O)C3=CC=CC=C3C2=O)[N+](=O)[O-]	2-Methyl-1-nitroanthraquinone	FYXKXZFTZBYYNP-UHFFFAOYSA-N	cancer-liver	1	training
309	22760-18-5	31508	CC1=CC2=C(C=C1)C(=NC(=O)N2C(C)C)C3=CC=CC=C3	Proquazone	JTIGKVIOEQASGT-UHFFFAOYSA-N	negative	0	training
310	22966-79-6	31586	C[C@]12CC[C@H]3[C@H]([C@@H]1CC[C@@H]2OC(=O)CC4=CC=C(C=C4)N(CCCl)CCCl)CCC5=C3C=CC(=C5)OC(=O)CC6=CC=C(C=C6)N(CCCl)CCCl	Estradiol mustard	LRSFXIJGHRPOQQ-VZRQQIPSSA-N	cancer-other	1	training
311	23950-58-5	32154	CC(C)(C#C)NC(=O)C1=CC(=CC(=C1)Cl)Cl	3,5-Dichloro(N-1,1-dimethyl-2-propynyl)benzamide	PHNUZKMIPFFYSO-UHFFFAOYSA-N	cancer-liver	1	training
312	37087-94-8	32335	C[C@@H]1C[C@@H](CN(C1)S(=O)(=O)C2=CC(=C(C=C2)Cl)C(=O)O)C	2-Chloro-5-(3,5-dimethylpiperidinosulphonyl)benzoic acid	IFXSWTIWFGIXQO-AOOOYVTPSA-N	cancer-liver	1	training
313	24554-26-5	32486	C1=C(OC(=C1)[N+](=O)[O-])C2=CSC(=N2)NC=O	N-[4-(5-Nitro-2-furyl)-2-thiazolyl]formamide	ZQBWQLJJMGJREB-UHFFFAOYSA-N	cancer-other	1	training
314	25081-31-6	32784	C(C(=O)O)N(CC(=O)O)N=O	Nitrosoiminodiacetic acid	XLYVHYXTFHZCNY-UHFFFAOYSA-N	negative	0	training
315	56-86-0	33032	C(CC(=O)O)[C@@H](C(=O)O)N	l-Glutamic acid	WHUUTDBJXJRKMK-VKHMYHEASA-N	negative	0	training
316	26308-28-1	33474	CCN1C2=C(C(=N1)C)NC(=O)CN=C2C3=CC=CC=C3	Ripazepam	YFHYNLHGFKXAIQ-UHFFFAOYSA-N	cancer-liver	1	training
317	29069-24-7	34457	C[C@]12C[C@@H]([C@H]3[C@H]([C@@H]1CC[C@@]2(C(=O)COC(=O)CCCC4=CC=C(C=C4)N(CCCl)CCCl)O)CCC5=CC(=O)C=C[C@]35C)O	Prednimustine	HFVNWDWLWUCIHC-GUPDPFMOSA-N	cancer-other	1	training
318	31873-81-1	35961	C1=COC(=C1)C2=CSC(=N2)NNC=O	Formic acid 2-[4-(2-furyl)-2-thiazolyl] hydrazide	KXPLUKKFTHWPIA-UHFFFAOYSA-N	negative	0	training
319	32852-21-4	36248	CC1=CSC(=N1)NNC=O	Formic acid 2-(4-methyl-2-thiazolyl) hydrazide	YVPLYHWVALRLFV-UHFFFAOYSA-N	cancer-other	1	training
320	34627-78-6	36868	CC(=O)OC(C=C)C1=CC2=C(C=C1)OCO2	1'-Acetoxysafrole	TXUCQVJZBXYDKH-UHFFFAOYSA-N	cancer-other	1	training
321	38514-71-5	38052	C1=C(OC(=C1)[N+](=O)[O-])C2=CSC(=N2)N	2-Amino-4-(5-nitro-2-furyl)thiazole	ZAVLMIGIVYJYMU-UHFFFAOYSA-N	cancer-other	1	training
322	38777-13-8	38097	CC(C)OC1=CC=CC=C1OC(=O)N(C)N=O	Nitroso-Baygon	LYVDQJOFFUOJJT-UHFFFAOYSA-N	cancer-other	1	training
323	40580-89-0	38523	C1CCCCCCN(CCCCC1)N=O	Nitrosododecamethyleneimine	HQHACWYQWDKBOZ-UHFFFAOYSA-N	cancer-liver	1	training
324	40762-15-0	38668	C1=CC=C(C(=C1)C2=NC(C(=O)N(C3=C2C=C(C=C3)Cl)CCO)O)F	Doxefazepam	VOJLELRQLPENHL-UHFFFAOYSA-N	negative	0	training
325	42011-48-3	39078	C1=C(OC(=C1)[N+](=O)[O-])C2=CSC(=N2)NC(=O)C(F)(F)F	2,2,2-Trifluoro-N-[4-(5-nitro-2- furyl)-2-thiazolyl]acetamide	GMHPROGCQPQRLG-UHFFFAOYSA-N	cancer-other	1	training
326	43033-72-3	39371	CC[C@@H](C(C[C@H](C)N(C)C)(C1=CC=CC=C1)C2=CC=CC=C2)OC(=O)C.Cl	6-Dimethylamino-4,4-diphenyl-3-heptanolacetate.HCl	UXBPQRGCVJOTNT-COBSGTNCSA-N	cancer-liver	1	training
327	51410-44-7	40003	COC1=CC=C(C=C1)C(C=C)O	1'-Hydroxyestragole	RUPMSBPCFQDMAY-UHFFFAOYSA-N	cancer-liver	1	training
328	51715-17-4	40094	CN(C1=NC2=C(C=C(C=C2)Cl)C(=[N+](C1)[O-])C3=CC=CC=C3)N=O	Nitrosochlordiazepoxide	VGNMVQBFGJATJZ-UHFFFAOYSA-N	negative	0	training
329	52918-63-5	40585	CC1([C@H]([C@H]1C(=O)O[C@H](C#N)C2=CC(=CC=C2)OC3=CC=CC=C3)C=C(Br)Br)C	Deltamethrin	OWZREIFADZCYQD-NSHGMRRFSA-N	negative	0	training
330	54143-56-5	41022	CC(=O)O.C1CCNC(C1)CNC(=O)C2=C(C=CC(=C2)OCC(F)(F)F)OCC(F)(F)F	Flecainide acetate	RKXNZRPQSOPPRN-UHFFFAOYSA-N	negative	0	training
331	55090-44-3	41320	CCCCCCCCCCCCN(C)N=O	N-Nitroso-N-methyl-N-dodecylamine	QPUKANZXOGADOB-UHFFFAOYSA-N	cancer-liver	1	training
332	55557-00-1	41473	C1CN(CCN(C1)N=O)N=O	Dinitrosohomopiperazine	FUCMFBXWLUGVIZ-UHFFFAOYSA-N	cancer-liver	1	training
333	55557-03-4	41474	COC(=O)C(C1CCCCN1N=O)C2=CC=CC=C2	Nitrosomethylphenidate	QGSDAATWYASQKL-UHFFFAOYSA-N	negative	0	training
334	50594-66-6	44073	C1=CC(=C(C=C1C(F)(F)F)Cl)OC2=CC(=C(C=C2)[N+](=O)[O-])C(=O)O	Acifluorfen	NUFNQYOELLVIPL-UHFFFAOYSA-N	cancer-liver	1	training
335	63019-65-8	44293	CC(=O)N(C1=CC=CC2=C1CC3=CC=CC=C32)C(=O)C	N-1-Diacetamidofluorene	SKNCUWLBDFPISU-UHFFFAOYSA-N	cancer-other	1	training
336	63412-06-6	44486	CN(C(=O)C1=CC=CC=C1)N=O	N-Methyl-N-nitrosobenzamide	SLTNUKIKMOOUID-UHFFFAOYSA-N	cancer-other	1	training
337	64005-62-5	46335	CCCCCN(C(=O)OCC)N=O	Nitrosoamylurethane	QKACYYADMAYIDQ-UHFFFAOYSA-N	cancer-other	1	training
338	64091-91-4	47289	CN(CCCC(=O)C1=CN=CC=C1)N=O	4-(Methylnitrosamino)-1-(3-pyridyl)-1-(butanone)	FLAQQSHRLBFIEZ-UHFFFAOYSA-N	cancer-liver	1	training
339	67730-10-3	49970	C1=CC2=NC3=C(N2C=C1)N=C(C=C3)N	Glu-P-2	BUXVIXBGMQXWGT-UHFFFAOYSA-N	cancer-liver	1	training
340	67730-11-4	49971	CC1=CC=CN2C1=NC3=C2N=C(C=C3)N	Glu-P-1	AYLURHVFAYRSHT-UHFFFAOYSA-N	cancer-liver	1	training
341	73785-40-7	52445	CC1=C(N=CN1)CSCCN=C(NC#N)N(C)N=O	N-Nitrosocimetidine	LFTUYYPQNCJQGN-UHFFFAOYSA-N	negative	0	training
342	75881-22-0	53394	CCCCCCCCCCN(C)N=O	N-Nitroso-N-methyldecylamine	FWIVLSMSIPKDRU-UHFFFAOYSA-N	cancer-liver	1	training
343	76180-96-6	53462	CN1C2=C(C3=C(C=C2)N=CC=C3)N=C1N	IQ	ARZWATDYIYAUTA-UHFFFAOYSA-N	cancer-liver	1	training
344	81795-07-5	54779	CC1N(C(SC(S1)C)C)N=O	N-Nitrosothialdine	HAKZNKDZKQNRNW-UHFFFAOYSA-N	cancer-liver	1	training
345	82018-90-4	54806	CCN(CC(F)(F)F)N=O	N-Nitroso(2,2,2-trifluoroethyl) ethylamine	FCYWOYUDCUKTJC-UHFFFAOYSA-N	cancer-other	1	training
346	83335-32-4	54990	C(CC(F)(F)F)CN(CCCC(F)(F)F)N=O	N-Nitroso-bis-(4,4,4-trifluoro-N-butyl)amine	USZDDJLVNDSPSY-UHFFFAOYSA-N	cancer-liver	1	training
347	86315-52-8	55690	COC1=C(C=CC(=C1)S(=O)C)C2=NC3=C(N2)C=NC=C3	Isomazole	JQUKCPUPFALELS-UHFFFAOYSA-N	cancer-other	1	training
348	88133-11-3	55784	CCOCCC1=C(N=C(N2C1=NC=N2)N)C3=CC=CC=C3	Bemitradine	OZSPQIXKOVJJGE-UHFFFAOYSA-N	cancer-liver	1	training
349	43054-45-1	60974	CCN(CC)CCOC1=CC=C(C=C1)C(=C(C2=CC=CC=C2)Cl)C3=CC=CC=C3.C(C(=O)O)C(CC(=O)O)(C(=O)O)O	Clomiphene citrate	PYTMYKVIJXPNBD-UHFFFAOYSA-N	negative	0	training
350	51-02-5	60975	CC(C)NCC(C1=CC2=CC=CC=C2C=C1)O.Cl	Pronethalol.HCl	QONLGXRPRAIDGI-UHFFFAOYSA-N	negative	0	training
351	57-39-6	60976	CC1CN1P(=O)(N2CC2C)N3CC3C	Metepa	AVUYXHYHTTVPRX-UHFFFAOYSA-N	cancer-other	1	training
352	99-80-9	60991	CN(C1=CC=C(C=C1)N=O)N=O	N-Methyl-N,4-dinitrosoaniline	FMGUJLASXUBMOP-UHFFFAOYSA-N	cancer-other	1	training
353	156-51-4	61100	C1=CC=C(C=C1)CCNN.OS(=O)(=O)O	Phenylethylhydrazine sulfate	RXBKMJIPNDOHFR-UHFFFAOYSA-N	cancer-other	1	training
354	712-68-5	61205	C1=C(OC(=C1)[N+](=O)[O-])C2=NN=C(S2)N	2-Amino-5-(5-nitro-2-furyl)-1,3,4-thiadiazole	SXZZHGJWUBJKHH-UHFFFAOYSA-N	cancer-other	1	training
355	13483-18-6	61632	C(COCCl)OCCl	Bis-1,2-(chloromethoxy)ethane	IDFLGSYEBJNWMK-UHFFFAOYSA-N	cancer-other	1	training
356	56894-91-8	62123	C1=CC(=CC=C1COCCl)COCCl	Bis-1,4-(chloromethoxy)-p-xylene	BXIVHTWXKYBJEM-UHFFFAOYSA-N	cancer-other	1	training
357	6109-97-3	62130	CCN1C2=C(C=C(C=C2)N)C3=CC=CC=C31.Cl	3-Amino-9-ethylcarbazole.HCl	UUYSTZWIFZYHRM-UHFFFAOYSA-N	cancer-liver	1	training
358	68006-83-7	62244	CC1=CC2=C(NC3=CC=CC=C32)N=C1N	MeA-alpha-C	IVLCGFRPPGNALI-UHFFFAOYSA-N	cancer-liver	1	training
359	77094-11-2	62274	CC1=CC2=C(C=CC=N2)C3=C1N(C(=N3)N)C	MeIQ	GMGWMIJIGUYNAY-UHFFFAOYSA-N	cancer-liver	1	training
360	77500-04-0	62275	CC1=CN=C2C=CC3=C(C2=N1)N=C(N3C)N	MeIQx	DVCCCQNKIYNAKB-UHFFFAOYSA-N	cancer-liver	1	training
361	20325-40-0	62311	COC1=C(C=CC(=C1)C2=CC(=C(C=C2)N)OC)N.Cl.Cl	3,3'-Dimethoxybenzidine.2HCl	UXTIAFYTYOEQHV-UHFFFAOYSA-N	cancer-liver	1	training
362	81-15-2	62329	CC1=C(C(=C(C(=C1[N+](=O)[O-])C(C)(C)C)[N+](=O)[O-])C)[N+](=O)[O-]	2,4,6-Trinitro-1,3-dimethyl-5-tert-butylbenzene	XMWRWTSZNLOZFN-UHFFFAOYSA-N	cancer-liver	1	training
363	531-18-0	62361	C(N(CO)C1=NC(=NC(=N1)N(CO)CO)N(CO)CO)O	Hexamethylmelamine	YGCOKJWKWLYHTG-UHFFFAOYSA-N	cancer-other	1	training
364	26148-68-5	62805	C1=CC=C2C(=C1)C3=C(N2)N=C(C=C3)N	A-alpha-C	FJTNLJLPLJDTRM-UHFFFAOYSA-N	cancer-liver	1	training
365	59333-67-4	62857	CNCCC(C1=CC=CC=C1)OC2=CC=C(C=C2)C(F)(F)F.Cl	Fluoxetine.HCl	GIYXAJPCNFJEHY-UHFFFAOYSA-N	negative	0	training
366	318-98-9	62882	CC(C)NCC(COC1=CC=CC2=CC=CC=C21)O.Cl	Propranolol.HCl	ZMRUPTIKESYGQW-UHFFFAOYSA-N	negative	0	training
367	38571-73-2	62896	C(C(COCCl)OCCl)OCCl	Tris-1,2,3-(chloromethoxy)propane	SWXSJBPKOPJPJL-UHFFFAOYSA-N	cancer-other	1	training
368	65765-07-3	63257	CC1=CC2=C(C=C1)C(=NC(=O)N2C(C)C)C3=CC(=CC=C3)O	Compound 50-892	HGZHAINHFBFXIU-UHFFFAOYSA-N	negative	0	training
369	33389-33-2	63763	C1=CC=C2C(=C1)C(=O)NC(N2)C3=CC=C(S3)[N+](=O)[O-]	1,2-Dihydro-2-(5-nitro-2-thienyl) quinazolin-4(3H)-one	UBXSITBCVLNRNX-UHFFFAOYSA-N	cancer-other	1	training
370	244-63-3	64961	C1=CC=C2C(=C1)C3=C(N2)C=NC=C3	Norharman	AIFRHYZBTHREPW-UHFFFAOYSA-N	negative	0	training
371	3131-60-0	65114	C1=NN(C(=O)N=C1N)[C@H]2[C@@H]([C@@H]([C@H](O2)CO)O)O	6-Azacytidine	OZQDLJNDRVBCST-SHUUEZRQSA-N	negative	0	training
372	959-24-0	66245	CC(C)NCC(C1=CC=C(C=C1)NS(=O)(=O)C)O.Cl	Sotalol.HCl	VIDRYROWYFWGSY-UHFFFAOYSA-N	negative	0	training
373	533-31-3	68289	C1OC2=C(O1)C=C(C=C2)O	Sesamol	LUSZGTFNYDARNI-UHFFFAOYSA-N	cancer-other	1	training
374	60784-46-5	68804	C(CO)NC(=O)N(CCCl)N=O	1-(2-HYDROXYETHYL)-NITROSO-3-CHLOROETHYLUREA	YJZJEQBSODVMTH-UHFFFAOYSA-N	cancer-liver	1	training
375	65089-17-0	68851	CC1=C(C(=CC=C1)NC2=CC(=NC(=N2)SCC(=O)NCCO)Cl)C	4-Chloro-6-(2,3-xylidino)-2-pyrimidinylthio(N-beta-hydroxyethyl)acetamide	RZCKTPORLKUFGY-UHFFFAOYSA-N	cancer-liver	1	training
376	720-69-4	69756	C1=C(OC(=C1)[N+](=O)[O-])C2=NC(=NC(=N2)N)N	4,6-Diamino-2-(5-nitro-2-furyl)-S-triazine	SUDMLGKFWIJSEI-UHFFFAOYSA-N	cancer-other	1	training
377	760-60-1	69800	CC(C)CN(C(=O)N)N=O	N-Nitroso-N-isobutylurea	SRSYSQPJIQFKKN-UHFFFAOYSA-N	cancer-other	1	training
378	785-30-8	69917	C1=CC(=CC=C1C(=O)NC2=CC=C(C=C2)N)N	4,4'-Diaminobenzanilide	XPAQFJJCWGSXGJ-UHFFFAOYSA-N	negative	0	training
379	971-15-3	70414	C1CCN(CC1)C(=S)SSSSSSC(=S)N2CCCCC2	Dipentamethylenethiuram hexasulfide	HPFHYRNETZEPIV-UHFFFAOYSA-N	negative	0	training
380	1011-73-0	70533	C1=CC(=C(C=C1[N+](=O)[O-])[N+](=O)[O-])[O-].[Na+]	2,4-Dinitrophenol, sodium	JMOHQJVXBQAVNW-UHFFFAOYSA-M	negative	0	training
381	1241-27-6	71064	CCCCCCCNCC1CCC(CC1)CNCCCCCCC.Cl.Cl	Heptylamine	YLDUYUMJGFBOMT-UHFFFAOYSA-N	negative	0	training
382	6452-73-9	71172	CC(C)NCC(COC1=CC=CC=C1OCC=C)O.Cl	Oxprenolol.HCl	COAJXCLTPGGDAJ-UHFFFAOYSA-N	negative	0	training
383	1078-38-2	71602	CC(=O)NNC(=O)C1=CC=NC=C1	1-Acetyl-2-isonicotinoylhydrazine	CVBGNAKQQUWBQV-UHFFFAOYSA-N	cancer-other	1	training
384	24365-47-7	72429	CC(C)C[C@@H](C(=O)N[C@@H](CC(C)C)C(=O)N[C@@H](CCCN=C(N)N)C=O)NC(=O)C	Leupeptin	GDBQQVLCIARPGH-ULQDDVLXSA-N	cancer-liver	1	training
385	3775-55-1	77406	C1=C(OC(=C1)[N+](=O)[O-])C2=NN=C(O2)N	2-Amino-5-(5-nitro-2-furyl)-1,3,4-oxadiazole	VTWQUFUBSCXPOW-UHFFFAOYSA-N	cancer-other	1	training
386	3851-16-9	77459	CN(C(=O)C1=CC=CC=C1C(=O)N(C)N=O)N=O	N,N'-Dimethyl-N,N'-dinitrosophthalamide	GOOMUPCAOADBSA-UHFFFAOYSA-N	negative	0	training
387	7347-49-1	81809	CCN(CC)C1=CC=C(C=C1)N=NC2=CC=[N+](C=C2)[O-]	N,N-Diethyl-4-(4'-[pyridyl-1'- oxide]azo)aniline	KSSLUCNXTYSFDY-UHFFFAOYSA-N	cancer-liver	1	training
388	10589-74-9	82746	CCCCCN(C(=O)N)N=O	1-Amyl-1-nitrosourea	YYTNAQDGJQPZFU-UHFFFAOYSA-N	cancer-other	1	training
389	13256-11-6	83271	CN(CCC1=CC=CC=C1)N=O	Nitroso-N-methyl-N-(2-phenyl)ethylamine	AVESHLVLHJKUKQ-UHFFFAOYSA-N	cancer-liver	1	training
390	13743-07-2	83695	C(CO)N(C(=O)N)N=O	1-(2-Hydroxyethyl)-1-nitrosourea	IVEXWRHLJIZLHF-UHFFFAOYSA-N	cancer-other	1	training
391	13752-51-7	83700	C1COCCN1C(=S)SN2CCOCC2	N-Oxydiethylene thiocarbamyl- N-oxydiethylene sulfenamide	HOEFWOBLOGZQIQ-UHFFFAOYSA-N	cancer-other	1	training
392	16813-36-8	85598	C1CN(C(=O)NC1=O)N=O	1-Nitroso-5,6-dihydrouracil	NTUQAPWIPIIWLT-UHFFFAOYSA-N	cancer-liver	1	training
393	16699-10-8	86054	CN(C1=CC=C(C=C1)C=CC2=CC=NC3=CC=CC=C23)N=O	4-(4-N-Methyl-N-nitrosaminostyryl)quinoline	IJOCQJGYYDLLAT-UHFFFAOYSA-N	cancer-liver	1	training
394	54-11-5	89594	CN1CCC[C@H]1C2=CN=CC=C2	Nicotine	SNICXCGAKADSCV-JTQLQIEISA-N	negative	0	training
395	24589-77-3	90547	C1=CC(=CC=C1C(=O)O)NN.Cl	p-Hydrazinobenzoic acid.HCl	XHLQMKQBCHYRLC-UHFFFAOYSA-N	cancer-other	1	training
396	39801-14-4	91632	C12C3(C4(C5(C3(C(C1(C5(C2(C4(Cl)Cl)Cl)Cl)Cl)(Cl)Cl)Cl)Cl)Cl)Cl	Mirex, photo-	KFDNXHKRTQRVGV-UHFFFAOYSA-N	cancer-other	1	training
397	26049-69-4	92248	CN(C)NC1=NC(=CS1)C2=CC=C(O2)[N+](=O)[O-]	2-(2,2-Dimethylhydrazino)-4-(5-nitro-2-furyl)thiazole	QXSIYYQGSPCIHN-UHFFFAOYSA-N	cancer-other	1	training
398	298-18-0	92270	C1[C@@H](O1)[C@H]2CO2	d,l-Diepoxybutane	ZFIVKAOQEXOYFY-QWWZWVQMSA-N	negative	0	training
399	51542-33-7	92336	CN(C(=O)NC1=NC2=CC=CC=C2S1)N=O	N-Nitrosobenzthiazuron	WLIJZJZXWRTQIH-UHFFFAOYSA-N	cancer-other	1	training
400	56654-52-5	92352	CCCCNC(=O)N(CCCC)N=O	1,3-Dibutyl-1-nitrosourea	OWGLVQAUSIPFBA-UHFFFAOYSA-N	cancer-other	1	training
401	26049-71-8	93098	C1=CC(=CC=C1C2=CSC(=N2)NN)N	2-Hydrazino-4-(p-aminophenyl) thiazole	AKZHPJMVGQRYGX-UHFFFAOYSA-N	cancer-other	1	training
402	42579-28-2	93239	C1C(=O)NC(=O)N1N=O	1-Nitrosohydantoin	UIDGJTUNLMQGLT-UHFFFAOYSA-N	cancer-other	1	training
403	63885-23-4	93349	CCN=C(N)N(N=O)[N+](=O)[O-]	N-Ethyl-N'-nitro-N-nitrosoguanidine	OHDJGZUFFIQWCM-UHFFFAOYSA-N	cancer-other	1	training
404	34176-52-8	98613	C1=CC=C(C=C1)C2=CSC(=N2)NN	2-Hydrazino-4-phenylthiazole	VTOUNUQLXMNNMQ-UHFFFAOYSA-N	negative	0	training
405	13483-19-7	99518	C(CCOCCl)COCCl	Bis-1,4-(chloromethoxy)butane	RRSXICBKOPODSP-UHFFFAOYSA-N	negative	0	training
406	1867-73-8	102175	CNC1=C2C(=NC=N1)N(C=N2)[C@H]3[C@@H]([C@@H]([C@H](O3)CO)O)O	(N-6)-Methyladenosine	VQAYFKKCNSOZKM-IOSLPCCCSA-N	negative	0	training
407	29611-03-8	104744	COC1=C2C3=C([C@H](CC3)O)C(=O)OC2=C4[C@@H]5C=CO[C@@H]5OC4=C1	Aflatoxicol	WYIWLDSPNDMZIT-IRWWLHRVSA-N	cancer-liver	1	training
408	63642-17-1	107919	CN(C(=O)NCCC[C@@H](C(=O)O)N)N=O	N-(N-Methyl-N-nitrosocarbamoyl)-l-ornithine	QEQYAQFYVFRGQD-YFKPBYRVSA-N	cancer-other	1	training
409	65734-38-5	107949	CC(=O)NNC1=CC=C(C=C1)CO	N'-Acetyl-4-(hydroxymethyl) phenylhydrazine	UFFJUAYKLIGSJF-UHFFFAOYSA-N	cancer-other	1	training
410	53757-28-1	107987	C1=C(OC(=C1)[N+](=O)[O-])C2=CSC=N2	4-(5-Nitro-2-furyl)thiazole	NOMAVCLLBXUQRD-UHFFFAOYSA-N	cancer-other	1	training
411	75881-20-8	115083	CCCCCCCCCCCCCCN(C)N=O	N-Nitroso-N-methyl-N-tetradecylamine	CCTMZRHJDTTZRF-UHFFFAOYSA-N	cancer-other	1	training
412	36133-88-7	118916	CC(=O)NCC1=NC(=NO1)C2=CC=C(O2)[N+](=O)[O-]	N-{[3-(5-Nitro-2-furyl)-1,2,4-oxadiazole-5-yl]-methyl}acetamide	KOURBVJNDMXAMA-UHFFFAOYSA-N	cancer-other	1	training
413	71752-70-0	123019	C(CN(C(=O)N)N=O)CO	1-(3-Hydroxypropyl)-1-nitrosourea	HDEPBBATNLJTLO-UHFFFAOYSA-N	cancer-other	1	training
414	91308-69-9	124479	C=CCN(CCO)N=O	N-Nitrosoallylethanolamine	ANASRAPCLNYZFM-UHFFFAOYSA-N	cancer-liver	1	training
415	96806-35-8	124538	CC(CN(C(=O)NCCCl)N=O)O	1-(2-Hydroxypropyl)-nitroso-3-chloroethylurea	LSLCMDFPNJQMJN-UHFFFAOYSA-N	cancer-other	1	training
416	59-05-2	126941	CN(CC1=CN=C2C(=N1)C(=NC(=N2)N)N)C3=CC=C(C=C3)C(=O)N[C@@H](CCC(=O)O)C(=O)O	Methotrexate	FBOZXECLQNJBKD-ZDUSSCGKSA-N	negative	0	training
417	78246-24-9	127579	C1CC(N(C1)N=O)C2=C[N+](=CC=C2)[O-]	N'-Nitrosonornicotine-1-N-oxide	ZQELURDMDMQXQV-UHFFFAOYSA-N	cancer-other	1	training
418	89911-78-4	128977	C(CO)N(CC(CO)O)N=O	N-Nitroso-2,3-dihydroxypropylethanolamine	ZRVIKNOBHVPYAM-UHFFFAOYSA-N	cancer-liver	1	training
419	68107-26-6	129276	CCCCCCCCCCCN(C)N=O	Nitrosomethylundecylamine	TZBWQIWBMMBFBF-UHFFFAOYSA-N	cancer-liver	1	training
420	22839-47-0	134601	COC(=O)[C@H](CC1=CC=CC=C1)NC(=O)[C@H](CC(=O)O)N	Aspartame	IAOZJIPTCAWIRG-QWRGUYRKSA-N	negative	0	training
421	75896-33-2	135654	CC(CN(CCO)N=O)O	N-Nitroso-(2-hydroxypropyl)-(2-hydroxyethyl)amine	YXVJNOXXPKIWIM-UHFFFAOYSA-N	cancer-liver	1	training
422	1150-42-1	135957	COC1=CC2=C(C3=C(C(=O)CC3)C(=O)O2)C(=C1)OC	5,7-Dimethoxycyclopentenone[3,2-c] coumarin	HMUODERFGQSGSR-UHFFFAOYSA-N	negative	0	training
423	88208-16-6	137413	C=CCN(CC(CO)O)N=O	N-Nitrosoallyl-2,3-dihydroxypropylamine	DMCULBAURODNDN-UHFFFAOYSA-N	cancer-other	1	training
424	17697-53-9	141980	CC(C)N=[N+](C(C)C)[O-]	2-Azoxypropane	GWSLPKWCBFSXCD-UHFFFAOYSA-N	cancer-other	1	training
425	18774-85-1	146461	CCCCCCN(C(=O)N)N=O	N-Hexylnitrosourea	JQPBCNVLZQUNCT-UHFFFAOYSA-N	cancer-other	1	training
426	33372-39-3	147528	C1=CC=C2C(=C1)C(=NC(=N2)C3=CC=C(S3)[N+](=O)[O-])N(CCO)CCO	4-Bis(2-hydroxyethyl)amino-2-(5-nitro-2-thienyl)quinazoline	QPDGFLZXRKDMRL-UHFFFAOYSA-N	cancer-other	1	training
427	33389-36-5	147531	C1=CC=C2C(=C1)C(=NC(=N2)C3=CC=C(S3)[N+](=O)[O-])NCCO	4-(2-Hydroxyethylamino)-2-(5-nitro-2-thienyl)quinazoline	QPLQHOGBXHYUEB-UHFFFAOYSA-N	cancer-other	1	training
428	38347-74-9	148247	C1COC(=O)N1N=O	3-Nitroso-2-oxazolidinone	MDACSTFMCAQQET-UHFFFAOYSA-N	cancer-liver	1	training
429	51325-35-0	148534	CC(=O)NC1=NC(=NC(=N1)C2=CC=C(O2)[N+](=O)[O-])NC(=O)C	N,N'-[6-(5-Nitro-2-furyl)-S-triazine-2,4-diyl]bisacetamide	OSFMMSIDSIQFIT-UHFFFAOYSA-N	cancer-other	1	training
430	58139-48-3	148824	C1COCCN1C2=NC(=NC3=CC=CC=C32)C4=CC=C(S4)[N+](=O)[O-]	4-Morpholino-2-(5-nitro-2-thienyl) quinazoline	LNXOGILCIQPLRX-UHFFFAOYSA-N	cancer-other	1	training
431	63886-77-1	149026	C1(=C(C(=C(C(=C1F)F)F)N)F)N.Cl.Cl	Tetrafluoro-m-phenylenediamine.2HCl	QYRFJLLXPINATB-UHFFFAOYSA-N	cancer-liver	1	training
432	61034-40-0	149740	CC1CN(CC(N1C(=O)C2=CC=CC=C2)C)N=O	1-Nitroso-3,5-dimethyl-4-benzoylpiperazine	FDCJUXDANKKYRM-UHFFFAOYSA-N	cancer-other	1	training
433	75881-18-4	150692	CC1CN(CC(N1C)C)N=O	1-Nitroso-3,4,5-trimethylpiperazine	MPIROZKBCRIFBH-UHFFFAOYSA-N	cancer-other	1	training
434	92177-50-9	151884	CC(=O)CNCC(C(N=O)O)O	Nitroso-2,3-dihydroxypropyl-2-oxopropylamine	UZFYRLGOFPAIDH-UHFFFAOYSA-N	cancer-other	1	training
435	34522-69-5	154903	C1=CC2=C(C=C(C=C2Br)Br)N=C1	5,7-Dibromoquinoline	VYTOCZMQXCNIPD-UHFFFAOYSA-N	negative	0	training
436	75011-65-3	156320	CC(C)C(=O)OC1=C(C=C(C=C1)CCNC)OC(=O)C(C)C.Cl	N-Methyldopamine,O,O'-diisobutyroylester.HCl	ALIXRWKJZYLBJI-UHFFFAOYSA-N	negative	0	training
437	75198-31-1	156324	C1=CC2=NC=C(N2C=C1)C3=CC=C(O3)[N+](=O)[O-]	3-(5-Nitro-2-furyl)-imidazo(1,2-alpha) pyridine	ZDFULRQJRIJLRF-UHFFFAOYSA-N	cancer-other	1	training
438	59-35-8	164530	CC1=CC(=NC(=N1)C2=CC=C(O2)[N+](=O)[O-])C	4,6-Dimethyl-2-(5-nitro-2-furyl) pyrimidine	RYBISXUKVTYYNN-UHFFFAOYSA-N	cancer-other	1	training
439	1146-71-0	164788	COC1=CC2=C(C3=C(CCC3)C(=O)O2)C(=C1)OC	5,7-Dimethoxycyclopentene[c]coumarin	DGLJLGBVHRQILR-UHFFFAOYSA-N	negative	0	training
440	51-55-8	174174	CN1[C@@H]2CC[C@H]1CC(C2)OC(=O)C(CO)C3=CC=CC=C3	Atropine	RKUNBYITZUJHSG-PJPHBNEVSA-N	negative	0	training
441	1162-65-8	186907	COC1=C2C3=C(C(=O)CC3)C(=O)OC2=C4[C@@H]5C=CO[C@@H]5OC4=C1	Aflatoxin B1	OQIQSTLJSLGHID-WNWIJWBNSA-N	cancer-liver	1	training
442	477-30-5	220401	CN[C@H]1CCC2=CC(=C(C(=C2C3=CC=C(C(=O)C=C13)OC)OC)OC)OC	Colcemid	NNJPGOLRFBJNIW-HNNXBMFYSA-N	negative	0	training
443	865-21-4	241903	CC[C@@]1(C[C@@H]2C[C@@](C3=C(CCN(C2)C1)C4=CC=CC=C4N3)(C5=C(C=C6C(=C5)[C@]78CCN9[C@H]7[C@@](C=CC9)([C@H]([C@@]([C@@H]8N6C)(C(=O)OC)O)OC(=O)C)CC)OC)C(=O)OC)O	Vinblastine	JXLYSJRDGCGARV-XQKSVPLYSA-N	negative	0	training
444	1508-45-8	251643	CCNNC(=O)[C@H]1[C@@H]([C@H](C2=CC3=C(C=C2[C@H]1C4=CC(=C(C(=C4)OC)OC)OC)OCO3)O)CO	Proresid	CPTIBDHUFVHUJK-NZYDNVMFSA-N	negative	0	training
445	13256-06-9	252237	CCCCCN(CCCCC)N=O	Dipentylnitrosamine	OELWBYBVFOLSTA-UHFFFAOYSA-N	cancer-liver	1	training
446	3546-10-9	266461	C[C@H](CCCC(C)C)[C@H]1CC[C@@H]2[C@@]1(CC[C@H]3[C@H]2CC=C4[C@@]3(CC[C@@H](C4)OC(=O)CC5=CC=C(C=C5)N(CCCl)CCCl)C)C	Phenesterin	SPJCRMJCFSJKDE-ZWBUGVOYSA-N	cancer-other	1	training
447	7008-42-6	345512	CC1(C=CC2=C3C(=C(C=C2O1)OC)C(=O)C4=CC=CC=C4N3C)C	Acronycine	SMPZPKRDRQOOHT-UHFFFAOYSA-N	cancer-other	1	training
448	2757-90-6	439517	C1=CC(=CC=C1CO)NNC(=O)CC[C@@H](C(=O)O)N	beta-N-[gamma-l(+)-Glutamyl]-4-hydroxymethylphenylhydrazine	SRSPQXBFDCGXIZ-JTQLQIEISA-N	negative	0	training
449	5989-27-5	440917	CC1=CC[C@@H](CC1)C(=C)C	d-Limonene	XMGQYMWWDOXHJM-JTQLQIEISA-N	cancer-other	1	training
450	126-07-8	441140	C[C@@H]1CC(=O)C=C([C@]12C(=O)C3=C(O2)C(=C(C=C3OC)OC)Cl)OC	Griseofulvin	DDUHZTYCFQRHIY-RBHXEPJQSA-N	cancer-liver	1	training
451	17673-25-5	442070	C[C@@H]1[C@H]([C@@]2([C@@H](C2(C)C)[C@H]3[C@]1([C@@H]4C=C(C(=O)[C@]4(CC(=C3)CO)O)C)O)O)O	Phorbol	QGVLYPPODPLXMB-UBTYZVCOSA-N	cancer-other	1	training
452	517-28-2	442514	C1C2=CC(=C(C=C2[C@H]3[C@@]1(COC4=C3C=CC(=C4O)O)O)O)O	Hematoxylin	WZUVPPKBWHMQCE-XJKSGUPXSA-N	cancer-other	1	training
453	303-47-9	442530	C[C@@H]1CC2=C(C=C(C(=C2C(=O)O1)O)C(=O)N[C@@H](CC3=CC=CC=C3)C(=O)O)Cl	Ochratoxin A	RWQKHEORZBHNRI-BMIGLBTASA-N	cancer-liver	1	training
454	302-79-4	444795	CC1=C(C(CCC1)(C)C)/C=C/C(=C/C=C/C(=C/C(=O)O)/C)/C	Retinoic acid	SHGAZHPCJJPHSC-YCNIQYBTSA-N	negative	0	training
455	56-53-1	448537	CC/C(=C(/CC)\C1=CC=C(C=C1)O)/C2=CC=C(C=C2)O	Diethylstilbestrol	RGLYKWWBQGJZGM-ISLYRVAYSA-N	cancer-other	1	training
456	54749-90-5	451706	C(CCl)N(C(=O)N[C@@H](C=O)[C@H]([C@@H]([C@@H](CO)O)O)O)N=O	Chlorozotocin	MKQWTWSXVILIKJ-LXGUWJNJSA-N	cancer-other	1	training
457	50-76-0	457193	C[C@@H]1[C@@H](C(=O)N[C@@H](C(=O)N2CCC[C@H]2C(=O)N(CC(=O)N([C@H](C(=O)O1)C(C)C)C)C)C(C)C)NC(=O)C3=C4C(=C(C=C3)C)OC5=C(C(=O)C(=C(C5=N4)C(=O)N[C@H]6[C@H](OC(=O)[C@@H](N(C(=O)CN(C(=O)[C@@H]7CCCN7C(=O)[C@H](NC6=O)C(C)C)C)C)C(C)C)C)N)C	Actinomycin D	RJURFGZVJUQBHK-IIXSONLDSA-N	cancer-other	1	training
458	115-02-6	460129	C([C@@H](C(=O)O)N)OC(=O)C=[N+]=[N-]	Azaserine	MZZGOOYMKKIOOX-VKHMYHEASA-N	cancer-other	1	training
459	148-82-3	460612	C1=CC(=CC=C1C[C@@H](C(=O)O)N)N(CCCl)CCCl	Melphalan	SGDBTWWWUNNDEQ-LBPRGKRZSA-N	cancer-other	1	training
460	68-89-3	522325	CC1=C(C(=O)N(N1C)C2=CC=CC=C2)N(C)CS(=O)(=O)[O-].[Na+]	Dipyrone	DJGAAPFSPWAYTJ-UHFFFAOYSA-M	cancer-liver	1	training
461	13366-73-9	557083	C12C3C(C4C1C5(C(C3(C4(C5(Cl)Cl)Cl)Cl)Cl)Cl)C6C2O6	Dieldrin, photo-	LOVDWMTZZYUFMA-UHFFFAOYSA-N	negative	0	training
462	75659-08-4	636407	C[C@H](CCC1=CC=CC=C1)NC[C@@H](C2=CC(=C(C=C2)O)C(=O)N)O.Cl	(R,R)-Dilevalol.HCl	WQVZLXWQESQGIF-WJKBNZMCSA-N	negative	0	training
463	127-47-9	638034	CC1=C(C(CCC1)(C)C)/C=C/C(=C/C=C/C(=C/COC(=O)C)/C)/C	Retinol acetate	QGNJRVVDBSJHIZ-QHLGVNSISA-N	negative	0	training
464	50-44-2	667490	C1=NC2=C(N1)C(=S)N=CN2	6-Mercaptopurine	GLVAUDGFNGKCSF-UHFFFAOYSA-N	negative	0	training
465	331-39-5	689043	C1=CC(=C(C=C1/C=C/C(=O)O)O)O	Caffeic acid	QAIPRVGONGVQAS-DUXPYHPUSA-N	cancer-other	1	training
466	149-30-4	697993	C1=CC=C2C(=C1)NC(=S)S2	2-Mercaptobenzothiazole	YXIWHUQXZSMYRE-UHFFFAOYSA-N	cancer-other	1	training
467	1212-29-9	727200	C1CCC(CC1)NC(=S)NC2CCCCC2	N,N'-Dicyclohexylthiourea	KAJICSGLHKRDLN-UHFFFAOYSA-N	negative	0	training
468	60-56-0	1349907	CN1C=CNC1=S	Methimazole	PMRYVIKBURPHAH-UHFFFAOYSA-N	cancer-other	1	training
469	404-86-4	1548943	CC(C)/C=C/CCCCC(=O)NCC1=CC(=C(C=C1)O)OC	Capsaicin	YKPUWZUDDOIDPM-SOFGYWHQSA-N	cancer-other	1	training
470	62-56-6	2723790	C(=S)(N)N	Thiourea	UMGDCJDMYOKAJW-UHFFFAOYSA-N	cancer-other	1	training
471	62-55-5	2723949	CC(=S)N	Thioacetamide	YUKQRDCYNOVPGJ-UHFFFAOYSA-N	cancer-liver	1	training
472	135-20-6	2724103	C1=CC=C(C=C1)N(N=O)[O-].[NH4+]	Cupferron	GDEBSAWXIHEMNF-UHFFFAOYSA-O	cancer-liver	1	training
473	116355-83-0	2733487	CCCC[C@@H](C)[C@H]([C@H](C[C@@H](C)C[C@@H](CCCC[C@H](C[C@@H]([C@H](C)N)O)O)O)OC(=O)C[C@@H](CC(=O)O)C(=O)O)OC(=O)C[C@@H](CC(=O)O)C(=O)O	Fumonisin B1	UVBUBMSSQKOIBE-DSLOAKGESA-N	cancer-liver	1	training
474	536-33-4	2761171	CCC1=NC=CC(=C1)C(=S)N	Ethionamide	AEOCXXJPGCBFJA-UHFFFAOYSA-N	cancer-other	1	training
475	2302-84-3	2775486	C(=O)NNC(=S)N	1-Formyl-3-thiosemicarbazide	KSKPFCYLLBRSBQ-UHFFFAOYSA-N	negative	0	training
476	80830-39-3	3036177	COC1=C(C=CC(=C1)N)N=NC2=CC=CC=C2	2-Methoxy-4-aminoazobenzene	SPVAQUCGELAFGL-UHFFFAOYSA-N	negative	0	training
477	64039-27-6	3048840	C1[C@@H]([C@H](O[C@H]1N2C=NC3=C2NC(=NC3=S)N)CO)O.O	beta-Thioguanine deoxyriboside	RAKKINBKYJWQIG-FPKZOZHISA-N	cancer-other	1	training
478	3570-75-0	3607071	C1=C(OC(=C1)[N+](=O)[O-])C2=CSC(=N2)NNC=O	Formic acid 2-[4-(5-nitro-2-furyl)-2-thiazolyl]hydrazide	DUWYZHLZDVCZIO-UHFFFAOYSA-N	cancer-liver	1	training
479	99-57-0	3613389	C1=CC(=C(C=C1[N+](=O)[O-])N)O	2-Amino-4-nitrophenol	VLZVIIYRNMWPSN-UHFFFAOYSA-N	cancer-other	1	training
480	26049-68-3	4021704	C1=C(OC(=C1)[N+](=O)[O-])C2=CSC(=N2)NN	2-Hydrazino-4-(5-nitro-2-furyl)thiazole	KNRMJISYMHRPTH-UHFFFAOYSA-N	cancer-other	1	training
481	26049-70-7	4373502	C1=CC(=CC=C1C2=CSC(=N2)NN)[N+](=O)[O-]	2-Hydrazino-4-(p-nitrophenyl) thiazole	ZOJPXCPZDSRIKP-UHFFFAOYSA-N	cancer-other	1	training
482	141-05-9	5271566	CCOC(=O)/C=C\C(=O)OCC	Diethylmaleate	IEPRKVQEAMIZSS-WAYWQWQTSA-N	negative	0	training
483	117-39-5	5280343	C1=CC(=C(C=C1C2=C(C(=O)C3=C(C=C(C=C3O2)O)O)O)O)O	Quercetin	REFJWTPEDVJJIY-UHFFFAOYSA-N	cancer-other	1	training
484	10048-13-2	5280389	COC1=C2C(=C3[C@@H]4C=CO[C@@H]4OC3=C1)OC5=CC=CC(=C5C2=O)O	Sterigmatocystin	UTSVPXMQSFGQTM-DCXZOGHSSA-N	cancer-liver	1	training
485	3688-53-7	5280707	C1=COC(=C1)/C(=C/C2=CC=C(O2)[N+](=O)[O-])/C(=O)N	AF-2	LYAHJFZLDZDIOH-VURMDHGXSA-N	cancer-other	1	training
486	50-14-6	5280793	C[C@H](/C=C/[C@H](C)C(C)C)[C@H]1CC[C@@H]\2[C@@]1(CCC/C2=C\C=C/3\C[C@H](CCC3=C)O)C	Calciferol	MECHNRXZTMCUDQ-RKHKHRCZSA-N	cancer-other	1	training
487	153-18-4	5280805	C[C@H]1[C@@H]([C@H]([C@H]([C@@H](O1)OC[C@@H]2[C@H]([C@@H]([C@H]([C@@H](O2)OC3=C(OC4=CC(=CC(=C4C3=O)O)O)C5=CC(=C(C=C5)O)O)O)O)O)O)O)O	Rutin trihydrate	IKGXIBQEEMLURG-NVPNHPEKSA-N	negative	0	training
488	520-18-3	5280863	C1=CC(=CC=C1C2=C(C(=O)C3=C(C=C(C=C3O2)O)O)O)O	Kaempferol	IYRMWMYZSQPJKC-UHFFFAOYSA-N	negative	0	training
489	51333-22-3	5281004	CCCC1O[C@@H]2C[C@H]3[C@@H]4CCC5=CC(=O)C=C[C@@]5([C@H]4[C@H](C[C@@]3([C@@]2(O1)C(=O)CO)C)O)C	Budesonide	VOVIALXJUBGFJZ-KWVAZRHASA-N	cancer-liver	1	training
490	17924-92-4	5281576	C[C@H]1CCCC(=O)CCC/C=C/C2=C(C(=CC(=C2)O)O)C(=O)O1	Zearalenone	MBMQEIFVQACCCH-QBODLPLBSA-N	cancer-liver	1	training
491	303-34-4	5281735	C/C=C(/C)\C(=O)O[C@H]1CCN2[C@@H]1C(=CC2)COC(=O)[C@@]([C@H](C)OC)(C(C)(C)O)O	Lasiocarpine	QHOZSLCIKHUPSU-LPLKQDONSA-N	cancer-liver	1	training
492	60102-37-6	5281741	C[C@@H]1C[C@@]2([C@H](O2)C)C(=O)O[C@@H]3CCN(C/C=C(\C3=O)/COC(=O)[C@]1(C)O)C	Petasitenine	CZQLULNMKQAIQL-PFDMWMSASA-N	cancer-liver	1	training
493	2318-18-5	5281752	C/C=C\1/C[C@H]([C@@](C(=O)OC/C/2=C/CN(CC[C@H](C2=O)OC1=O)C)(C)O)C	Senkirkine	HPDHKHMHQGCNPE-QLJRNOHWSA-N	cancer-liver	1	training
494	22571-95-5	5281754	C/C=C(\C)/C(=O)O[C@@H]1CCN2[C@@H]1C(=CC2)COC(=O)[C@@]([C@H](C)O)(C(C)C)O	Symphytine	MVWPTZQHBOWRTF-SMLWLWDZSA-N	cancer-liver	1	training
495	59122-46-2	5282381	CCCCC(C)(C/C=C/[C@H]1[C@@H](CC(=O)[C@@H]1CCCCCCC(=O)OC)O)O	Misoprostol	OJLOPKGSLYJEMD-URPKTTJQSA-N	negative	0	training
496	28754-68-9	5284340	C1=C(OC(=C1)[N+](=O)[O-])/C=C/C2=NOC(=N2)N	trans-5-Amino-3[2-(5-nitro-2-furyl)vinyl]-1,2,4-oxadiazole	RMZNNIOKNRDECR-HNQUOIGGSA-N	cancer-other	1	training
497	36711-31-6	5284348	C(C(CBr)Br)OP(=O)([O-])OCC(CBr)Br.C(C(CBr)Br)OP(=O)([O-])OCC(CBr)Br.[Mg+2]	Bis(2,3-dibromopropyl)phosphate,magnesium salt	ISAQEMSCDXXEBE-UHFFFAOYSA-L	cancer-liver	1	training
498	87-29-6	5284369	C1=CC=C(C=C1)/C=C/COC(=O)C2=CC=CC=C2N	Cinnamyl anthranilate	GABQNAFEZZDSCM-RMKNXTFCSA-N	cancer-liver	1	training
499	59865-13-3	5284373	CC[C@H]1C(=O)N(CC(=O)N([C@H](C(=O)N[C@H](C(=O)N([C@H](C(=O)N[C@H](C(=O)N[C@@H](C(=O)N([C@H](C(=O)N([C@H](C(=O)N([C@H](C(=O)N([C@H](C(=O)N1)[C@@H]([C@H](C)C/C=C/C)O)C)C(C)C)C)CC(C)C)C)CC(C)C)C)C)C)CC(C)C)C)C(C)C)CC(C)C)C)C	Cyclosporin A	PMATZTZNYRCHOR-CGLBZJNRSA-N	negative	0	training
500	2303-16-4	5284376	CC(C)N(C(C)C)C(=O)SC/C(=C/Cl)/Cl	Diallate	SPANOECCGNXGNR-UITAMQMPSA-N	cancer-liver	1	training
501	10318-26-0	5284380	C([C@H]([C@@H]([C@@H]([C@H](CBr)O)O)O)O)Br	Dibromodulcitol	VFKZTMPDYBFSTM-GUCUJZIJSA-N	cancer-other	1	training
502	6119-92-2	5284389	CCCCCCC(C)C1=C(C(=CC(=C1)[N+](=O)[O-])[N+](=O)[O-])OC(=O)/C=C/C	Dinitro(1-methylheptyl)phenyl crotonate	NIOPZPCMRQGZCE-WEVVVXLNSA-N	negative	0	training
503	3458-22-8	5284401	CS(=O)(=O)OCCCNCCCOS(=O)(=O)C.Cl	3,3'-Iminobis-1-propanoldimethanesulfonate(ester).HCl	YWCASUPWYFFUHE-UHFFFAOYSA-N	cancer-other	1	training
504	100643-96-7	5284402	CC1(C2=C(C=CC(=C2)C3=NNC(=O)CC3)NC1=O)C	Indolidan	LZCQFJKUAIWHRW-UHFFFAOYSA-N	cancer-other	1	training
505	112-63-0	5284421	CCCCC/C=C\C/C=C\CCCCCCCC(=O)OC	Methyl linoleate, native	WTTJVINHCBCLGX-NQLNTKRDSA-N	negative	0	training
506	21308-79-2	5284424	CCCCCCC(=O)/C=C/CCCCCCCCC(=O)OC	Methyl 12-oxo-trans-10-octadecenoate	OHJIOGJOUIOUTD-DTQAZKPQSA-N	negative	0	training
507	23282-20-4	5284433	CC1=C[C@@H]2[C@]([C@@H](C1=O)O)([C@]3([C@@H]([C@H]([C@H]([C@@]34CO4)O2)O)O)C)CO	Nivalenol	UKOTXHQERFPCBU-XBXCNEFVSA-N	negative	0	training
508	63-92-3	5284441	CC(COC1=CC=CC=C1)N(CCCl)CC2=CC=CC=C2.Cl	Phenoxybenzamine.HCl	VBCPVIWPDJVHAN-UHFFFAOYSA-N	cancer-other	1	training
509	66-05-7	5284445	CC(CC1=CC=CC=C1)NN.Cl	beta-Phenylisopropylhydrazine.HCl	HXCTUSBYMZQLKB-UHFFFAOYSA-N	negative	0	training
510	7681-93-8	5284447	C[C@@H]1C/C=C/C=C/C=C/C=C/[C@@H](C[C@H]2[C@@H]([C@H](C[C@](O2)(C[C@H](C[C@@H]3[C@H](O3)/C=C/C(=O)O1)O)O)O)C(=O)O)O[C@H]4[C@H]([C@H]([C@@H]([C@H](O4)C)O)N)O	Pimaricin	NCXMLFZGDNKEPB-FFPOYIOWSA-N	negative	0	training
511	59-33-6	5284451	CN(C)CCN(CC1=CC=C(C=C1)OC)C2=CC=CC=N2.C(=C\C(=O)O)\C(=O)O	Pyrilamine maleate	JXYWFNAQESKDNC-BTJKTKAUSA-N	cancer-liver	1	training
512	72629-69-7	5284454	C/C/1=C\CC/C(=C/C=C(\[C@H](C/C(=C/CC1)/C)O)/C(C)C)/C	Sarcophytol A	YADVRLOQIWILGX-MIWLTHJTSA-N	negative	0	training
513	961-11-5	5284462	COP(=O)(OC)O/C(=C\Cl)/C1=CC(=C(C=C1Cl)Cl)Cl	Tetrachlorvinphos	UBCKGWBNUIFUST-YHYXMXQVSA-N	cancer-liver	1	training
514	75104-43-7	5284473	CC1=C2C(=C(N=C1N)C)C3=CC=CC=C3N2.CC(=O)O	Trp-P-1 acetate	UXNRBAJNAWIPGF-UHFFFAOYSA-N	cancer-liver	1	training
515	72254-58-1	5284476	CC1=C2C3=CC=CC=C3NC2=CC(=N1)N	Trp-P-2 acetate	LKKMLIBUAXYLOY-UHFFFAOYSA-N	cancer-liver	1	training
516	5803-51-0	5377410	COC1=CC(=C(C=C1)OC)/C=C/C2=CC=C(C=C2)N	2,5-Dimethoxy-4'-aminostilbene	OZGXSMOLBWHIQA-ZZXKWVIFSA-N	cancer-liver	1	training
517	59-87-0	5447130	C1=C(OC(=C1)[N+](=O)[O-])/C=N/NC(=O)N	5-Nitro-2-furaldehyde semicarbazone	IAIWVQXQOWNYOU-FPYGCLRLSA-N	cancer-other	1	training
518	5036-03-3	6321387	C1CN(C(=O)N1CCO)/N=C/C2=CC=C(O2)[N+](=O)[O-]	1-(2-Hydroxyethyl)-3-[(5-nitrofurfurylidene)amino]-2-imidazolidinone	VDDRCCQKLVNYHQ-YRNVUSSQSA-N	cancer-other	1	training
519	7336-20-1	6433499	C1=CC(=C(C=C1/C=C/C2=C(C=C(C=C2)N)S(=O)(=O)[O-])S(=O)(=O)[O-])N.[Na+].[Na+]	4,4'-Diamino-2,2'-stilbenedisulfonic acid, disodium salt	YTBLSHUGVOUPFI-BFAXJPPBSA-L	negative	0	training
520	67-20-9	6604200	C1C(=O)NC(=O)N1/N=C/C2=CC=C(O2)[N+](=O)[O-]	1-[(5-Nitrofurfurylidene)amino]hydantoin	NXFQHRVNIOXGAQ-YCRREMRBSA-N	cancer-other	1	training
521	15879-93-3	7057995	C([C@H]([C@@H]1[C@@H]([C@@H]2[C@H](O1)O[C@@H](O2)C(Cl)(Cl)Cl)O)O)O	Anhydroglucochloral	OJYGBLRPYBAHRT-IPQSZEQASA-N	negative	0	training
522	1133-64-8	7069270	C1CCN([C@@H](C1)C2=CN=CC=C2)N=O	Nitrosoanabasine	BXYPVKMROLGXJI-JTQLQIEISA-N	cancer-other	1	training
523	16568-02-8	9548611	C/C=N/N(C)C=O	Acetaldehyde methylformylhydrazone	IMAGWKUTFZRWSB-HWKANZROSA-N	cancer-other	1	training
524	57590-22-4	9556443	CCCCC/C=N/N(C)C=O	Hexanal methylformylhydrazone	QRMNFHXPNKCTAG-VQHVLOKHSA-N	cancer-liver	1	training
525	772-43-0	9566269	C1=C(OC(=C1)[N+](=O)[O-])/C(=N/O)/N	5-Nitro-2-furamidoxime	WKIPQMJEBCEACS-UHFFFAOYSA-N	negative	0	training
526	555-84-0	9568055	C1CN(C(=O)N1)/N=C/C2=CC=C(O2)[N+](=O)[O-]	1-[(5-Nitrofurfurylidene)amino]-2-imidazolidinone	VSVAVMVWTLLTCH-BJMVGYQFSA-N	cancer-other	1	training
527	13010-10-1	9570282	CCCCCN(/C(=N/[N+](=O)[O-])/N)N=O	N-Pentyl-N'-nitro-N-nitrosoguanidine	OKMNBMCHWAWZBL-UHFFFAOYSA-N	negative	0	training
528	21638-36-8	9570365	CC1CN(C(=O)N1)/N=C/C2=CC=C(O2)[N+](=O)[O-]	4-Methyl-1-[(5-nitrofurfurylidene)amino]-2-imidazolidinone	BJUPUKIYTMVLCW-ONNFQVAWSA-N	cancer-other	1	training
529	55738-54-0	9570442	CN(C)/C=N/C1=NN=C(O1)/C=C/C2=CC=C(O2)[N+](=O)[O-]	trans-2-[(Dimethylamino)methylimino]-5-[2-(5-nitro-2-furyl)vinyl]-1,3,4-oxadiazole	QLKWZSDBTUTCIJ-PPRDQHCASA-N	cancer-other	1	training
530	57590-20-2	9570634	CCCC/C=N/N(C)C=O	Pentanal methylformylhydrazone	IHTUGUQGWPOOJG-SOFGYWHQSA-N	cancer-liver	1	training
531	3031-51-4	9576185	C1COCCN1CC2CN(C(=O)O2)/N=C/C3=CC=C(O3)[N+](=O)[O-].Cl	l-5-Morpholinomethyl-3-[(5-nitrofurfurylidene)amino]-2-oxazolidinone.HCl	PPSVFZXMDMUIGB-FJUODKGNSA-N	cancer-other	1	training
532	23135-22-0	9595287	CNC(=O)O/N=C(/C(=O)N(C)C)\SC	Oxamyl	KZAUOCCYDRDERY-UITAMQMPSA-N	negative	0	training
533	7519-36-0	10419304	C1C[C@H](N(C1)N=O)C(=O)O	Nitrosoproline	WLKPHJWEIIAIFW-BYPYZUCNSA-N	negative	0	training
534	309-00-2	12310947	C1[C@@H]2C=C[C@H]1[C@H]3[C@@H]2[C@]4(C(=C([C@@]3(C4(Cl)Cl)Cl)Cl)Cl)Cl	Aldrin	QBYJBZPUGVGKQQ-SJJAEHHWSA-N	cancer-liver	1	training
535	23746-34-1	23662398	C(CO)N(CCO)C(=S)[S-].[K+]	Bis-2-hydroxyethyldithiocarbamic acid,potassium	JGNZPIJKQREYSO-UHFFFAOYSA-M	cancer-liver	1	training
536	16170-75-5	23663958	COC1=CC=C(C=C1)C(=O)/C(=C/C(=O)[O-])/Br.[Na+]	Cytembena	DVDCIQWIGOVWEX-BORNJIKYSA-M	cancer-other	1	training
537	139-05-9	23665706	C1CCC(CC1)NS(=O)(=O)[O-].[Na+]	Cyclamate, sodium	UDIPTWFVPPPURJ-UHFFFAOYSA-M	cancer-liver	1	training
538	143-19-1	23665730	CCCCCCCC/C=C\CCCCCCCC(=O)[O-].[Na+]	Oleate, sodium	BCKXLBQYZLBQEK-KVVVOXFISA-M	negative	0	training
539	57-30-7	23674889	CCC1(C(=O)NC(=NC1=O)[O-])C2=CC=CC=C2.[Na+]	Phenobarbital, sodium	WRLGYAWRGXKSKG-UHFFFAOYSA-M	cancer-liver	1	training
540	132-98-9	23676814	CC1([C@@H](N2[C@H](S1)[C@@H](C2=O)NC(=O)COC3=CC=CC=C3)C(=O)[O-])C.[K+]	Penicillin VK	HCTVWSOKIJULET-LQDWTQKMSA-M	negative	0	training
541	144-02-5	23681217	CCC1(C(=O)NC(=NC1=O)[O-])CC.[Na+]	Barbital, sodium	RGHFKWPGWBFQLN-UHFFFAOYSA-M	cancer-other	1	training
542	6381-77-7	23683938	C([C@H]([C@@H]1C(=C(C(=O)O1)O)[O-])O)O.[Na+]	Erythorbate, sodium	PPASLZSBLFJQEF-RKJRWTFHSA-M	negative	0	training
543	2922-54-5	23690498	C(CC(=O)[O-])C(=O)O.[Na+]	Monosodium succinate	KZQSXALQTHVPDQ-UHFFFAOYSA-M	negative	0	training
544	24382-04-5	23712862	[CH-](C=O)C=O.[Na+]	Malonaldehyde, sodium salt	VJHFGYJILVGPCS-UHFFFAOYSA-N	cancer-liver	1	training
545	518-75-2	54680783	C[C@@H]1[C@H](OC=C2C1=C(C(=C(C2=O)C(=O)O)O)C)C	Citrinin	CBGDIJWINPWWJW-IYSWYEEDSA-N	cancer-other	1	training
546	12663-46-6	57134655	CC[C@H]1C(=O)N[C@H](C(=O)N[C@H](CC(=O)N[C@H](C(=O)N2C[C@H]([C@H]([C@H]2C(=O)N1)Cl)Cl)CO)C3=CC=CC=C3)CO	Cyclochlorotine	PMBVHCCVEPYDSN-BADCMNFISA-N	cancer-liver	1	training
547	65176-75-2	101683037	COC1=C(C2=C(C(=C1)O)C(=O)C3=C(C=C4C(=C3O2)[C@@H]5C=CO[C@@H]5O4)OC)OC	5,6-Dimethoxysterigmatocystin	RSPJLZQIZABVSE-FFVOIRBGSA-N	cancer-liver	1	training
548	71277-79-7	118984432	C[C@]12CC[C@](C[C@H]1C3=CC(=O)[C@@H]4[C@]5(CC[C@@H](C([C@@H]5CC[C@]4([C@@]3(CC2)C)C)(C)C)O[C@@H]6[C@@H]([C@H]([C@@H]([C@H](O6)C(=O)[O-])O)O)O[C@H]7[C@@H]([C@H]([C@@H]([C@H](O7)C(=O)[O-])O)O)O)C)(C)C(=O)[O-].[Na+].[Na+]	Glycyrrhizinate, disodium	KPQJOKRSYYJJEL-VLQRKCJKSA-K	negative	0	training
549	578-76-7	135398679	CN1C=NC2=C1C(=O)NC(=N2)N	7-Methylguanine	FZWGECJQACGGTI-UHFFFAOYSA-N	negative	0	training
550	13292-46-1	135398735	C[C@H]1/C=C/C=C(\C(=O)NC2=C(C(=C3C(=C2O)C(=C(C4=C3C(=O)[C@](O4)(O/C=C/[C@@H]([C@H]([C@H]([C@@H]([C@@H]([C@@H]([C@H]1O)C)O)C)OC(=O)C)C)OC)C)C)O)O)/C=N/N5CCN(CC5)C)/C	Rifampicin	JQXXHWHPUNPDRT-WLSIYKJHSA-N	cancer-liver	1	training
551	4342-03-4	135398738	CN(C)/N=N/C1=C(NC=N1)C(=O)N	Dacarbazine	FDKXTQMXEQVLRF-ZHACJKMWSA-N	cancer-other	1	training
552	149-17-7	135412163	COC1=C(C=CC(=C1)/C=N/NC(=O)C2=CC=NC=C2)O	Isonicotinic acid vanillylidenehydrazide	PSWOBQSIXLVPDV-CXUHLZMHSA-N	cancer-other	1	training
553	13010-07-6	135448158	CCCN(C(=N)N[N+](=O)[O-])N=O	N-Propyl-N'-nitro-N-nitrosoguanidine	PVVCHFOAZOVDRK-UHFFFAOYSA-N	cancer-other	1	training
554	13010-08-7	135464373	CCCCN(C(=N)N[N+](=O)[O-])N=O	N-Butyl-N'-nitro-N-nitrosoguanidine	FJNCPBNCTRDXFB-UHFFFAOYSA-N	negative	0	training
555	100-51-6	244	C1=CC=C(C=C1)CO	Benzyl alcohol	WVDDGKGOMKODPV-UHFFFAOYSA-N	negative	0	development
556	149-91-7	370	C1=C(C=C(C(=C1O)O)O)C(=O)O	Gallic acid	LNTHITQWFMADLM-UHFFFAOYSA-N	negative	0	development
557	59-67-6	938	C1=CC(=CN=C1)C(=O)O	Nicotinic acid	PVNIIMVLHYAWGP-UHFFFAOYSA-N	negative	0	development
558	66-22-8	1174	C1=CNC(=O)NC1=O	Uracil	ISAKRJDGNUQOIC-UHFFFAOYSA-N	cancer-other	1	development
559	94-75-7	1486	C1=CC(=C(C=C1Cl)Cl)OCC(=O)O	2,4-Dichlorophenoxyacetic acid	OVSKIKFHRZPJSS-UHFFFAOYSA-N	negative	0	development
560	61-82-5	1639	C1=NNC(=N1)N	3-Aminotriazole	KLSJWNVTNUYHDU-UHFFFAOYSA-N	cancer-liver	1	development
561	103-90-2	1983	CC(=O)NC1=CC=C(C=C1)O	Acetaminophen	RZVAJINKPMORJF-UHFFFAOYSA-N	cancer-liver	1	development
562	302-17-0	2707	C(C(Cl)(Cl)Cl)(O)O	Chloral hydrate	RNFNDJAIBTYOQL-UHFFFAOYSA-N	cancer-liver	1	development
563	938-73-8	3282	CCOC1=CC=CC=C1C(=O)N	o-Ethoxybenzamide	SBNKFTQSBPKMBZ-UHFFFAOYSA-N	cancer-liver	1	development
564	60142-96-3	3446	C1CCC(CC1)(CC(=O)O)CN	1-(Aminomethyl)cyclohexaneacetic acid	UGJMXCAKCUNAIE-UHFFFAOYSA-N	negative	0	development
565	66-27-3	4156	COS(=O)(=O)C	Methyl methanesulfonate	MBABOKRGFJTBAE-UHFFFAOYSA-N	cancer-other	1	development
566	106-46-7	4685	C1=CC(=CC=C1Cl)Cl	1,4-Dichlorobenzene	OCJBOOLMMGQPQU-UHFFFAOYSA-N	cancer-liver	1	development
567	137-26-8	5455	CN(C)C(=S)SSC(=S)N(C)C	Tetramethylthiuram disulfide	KUAZQDVKQLNFPE-UHFFFAOYSA-N	negative	0	development
568	75-25-2	5558	C(Br)(Br)Br	Tribromomethane	DIKBFYAXUHHXCS-UHFFFAOYSA-N	cancer-other	1	development
569	57-06-7	5971	C=CCN=C=S	Allyl isothiocyanate	ZOJBYZNEUISWFT-UHFFFAOYSA-N	cancer-other	1	development
570	61-94-9	6107	CN1CCC=C(C1)C(=O)OC.Cl	Arecoline.HCl	LQSWCSYIDIBGRR-UHFFFAOYSA-N	cancer-liver	1	development
571	69-65-8	6251	C([C@H]([C@H]([C@@H]([C@@H](CO)O)O)O)O)O	d-Mannitol	FBPFZTCFMRRESA-KVTDHHQDSA-N	negative	0	development
572	75-47-8	6374	C(I)(I)I	Iodoform	OKJPEAGHQZHRQV-UHFFFAOYSA-N	negative	0	development
573	75-56-9	6378	CC1CO1	1,2-Propylene oxide	GOOHAUXETOMSMM-UHFFFAOYSA-N	cancer-other	1	development
574	75-71-8	6391	C(F)(F)(Cl)Cl	Dichlorodifluoromethane	PXBRQCKWGAHEHS-UHFFFAOYSA-N	negative	0	development
575	75-88-7	6408	C(C(F)(F)F)Cl	2-Chloro-1,1,1-trifluoroethane	CYXIKYKBLDZZNW-UHFFFAOYSA-N	cancer-other	1	development
576	79-01-6	6575	C(=C(Cl)Cl)Cl	Trichloroethylene	XSTXAVWGXDQKEL-UHFFFAOYSA-N	cancer-liver	1	development
577	80-33-1	6635	C1=CC(=CC=C1OS(=O)(=O)C2=CC=C(C=C2)Cl)Cl	p-Chlorophenyl-p-chlorobenzene sulfonate	RZXLPPRPEOUENN-UHFFFAOYSA-N	negative	0	development
578	85-44-9	6811	C1=CC=C2C(=C1)C(=O)OC2=O	Phthalic anhydride	LGRFSURHDFAFJT-UHFFFAOYSA-N	negative	0	development
579	86-86-2	6861	C1=CC=C2C(=C1)C=CC=C2CC(=O)N	1-Naphthalene acetamide	XFNJVKMNNVCYEK-UHFFFAOYSA-N	negative	0	development
580	90-43-7	7017	C1=CC=C(C=C1)C2=CC=CC=C2O	o-Phenylphenol	LLEMOWNGBBNAJR-UHFFFAOYSA-N	cancer-other	1	development
581	91-23-6	7048	COC1=CC=CC=C1[N+](=O)[O-]	o-Nitroanisole	CFBYEGUGFPZCNF-UHFFFAOYSA-N	cancer-liver	1	development
582	91-79-2	7066	CN(C)CCN(CC1=CSC=C1)C2=CC=CC=N2	Thenyldiamine	RCGYDFVCAAKKNG-UHFFFAOYSA-N	negative	0	development
583	93-72-1	7158	CC(C(=O)O)OC1=CC(=C(C=C1Cl)Cl)Cl	2-(2,4,5-Trichlorophenoxy)propionic acid	ZLSWBLPERHFHIS-UHFFFAOYSA-N	negative	0	development
584	95-50-1	7239	C1=CC=C(C(=C1)Cl)Cl	1,2-Dichlorobenzene	RFFLAFLAYFXFSW-UHFFFAOYSA-N	negative	0	development
585	95-80-7	7261	CC1=C(C=C(C=C1)N)N	2,4-Diaminotoluene	VOZKAJLKRJDJLL-UHFFFAOYSA-N	cancer-liver	1	development
586	96-12-8	7280	C(C(CBr)Br)Cl	1,2-Dibromo-3-chloropropane	WBEJYOJJBDISQU-UHFFFAOYSA-N	cancer-other	1	development
587	98-85-1	7409	CC(C1=CC=CC=C1)O	alpha-Methylbenzyl alcohol	WAPNOHKVXSQRPX-UHFFFAOYSA-N	cancer-other	1	development
588	102-71-6	7618	C(CO)N(CCO)CCO	Triethanolamine	GSEJCLTVZPLZKY-UHFFFAOYSA-N	cancer-other	1	development
589	103-16-2	7638	C1=CC=C(C=C1)COC2=CC=C(C=C2)O	Hydroquinone monobenzyl ether	VYQNWZOUAUKGHI-UHFFFAOYSA-N	negative	0	development
590	105-11-3	7737	C1=CC(=CC=C1NO)N=O	p-Quinone dioxime	DZCCLNYLUGNUKQ-UHFFFAOYSA-N	cancer-other	1	development
591	106-89-8	7835	C1C(O1)CCl	Epichlorohydrin	BRLQWZUYTZBJKN-UHFFFAOYSA-N	cancer-other	1	development
592	106-93-4	7839	C(CBr)Br	1,2-Dibromoethane	PAAZPARNPHGIKF-UHFFFAOYSA-N	cancer-liver	1	development
593	110-00-9	8029	C1=COC=C1	Furan	YLQBMQCUIZJEEH-UHFFFAOYSA-N	cancer-liver	1	development
594	111-46-6	8117	C(COCCO)O	Diethylene glycol	MTHSVFCYNBDYFN-UHFFFAOYSA-N	cancer-other	1	development
595	121-66-4	8486	C1=C(SC(=N1)N)[N+](=O)[O-]	2-Amino-5-nitrothiazole	MIHADVKEHAFNPG-UHFFFAOYSA-N	cancer-other	1	development
596	137-17-7	8717	CC1=CC(=C(C=C1C)N)C	2,4,5-Trimethylaniline	BMIPMKQAAJKBKP-UHFFFAOYSA-N	cancer-liver	1	development
597	139-65-1	8765	C1=CC(=CC=C1N)SC2=CC=C(C=C2)N	4,4'-Thiodianiline	ICNFHJVPAJKPHW-UHFFFAOYSA-N	cancer-liver	1	development
598	140-67-0	8815	COC1=CC=C(C=C1)CC=C	Estragole	ZFMSMUAANRJZFM-UHFFFAOYSA-N	cancer-liver	1	development
599	140-79-4	8819	C1CN(CCN1N=O)N=O	Dinitrosopiperazine	WNSYEWGYAFFSSQ-UHFFFAOYSA-N	cancer-other	1	development
600	142-04-1	8870	C1=CC=C(C=C1)N.Cl	Aniline.HCl	MMCPOSDMTGQNKG-UHFFFAOYSA-N	cancer-other	1	development
601	150-76-5	9015	COC1=CC=C(C=C1)O	4-Methoxyphenol	NWVVVBRKAWDGAB-UHFFFAOYSA-N	negative	0	development
602	151-56-4	9033	C1CN1	Ethylene imine	NOWKCMXCCJGMRR-UHFFFAOYSA-N	cancer-liver	1	development
603	126-85-2	9335	C[N+](CCCl)(CCCl)[O-]	Nitrogen mustard N-oxide	AFLXUQUGROGEFA-UHFFFAOYSA-N	cancer-other	1	development
604	512-56-1	10541	COP(=O)(OC)OC	Trimethylphosphate	WVLBCYQITXONBZ-UHFFFAOYSA-N	cancer-other	1	development
605	553-53-7	11112	C1=CC(=CN=C1)C(=O)NN	Nicotinic acid hydrazide	KFUSANSHCADHNJ-UHFFFAOYSA-N	cancer-other	1	development
606	556-52-5	11164	C1C(O1)CO	Glycidol	CTKINSOISVBQLD-UHFFFAOYSA-N	cancer-liver	1	development
607	597-25-1	11698	COP(=O)(N1CCOCC1)OC	Dimethyl morpholinophosphoramidate	BZXUQIDKDGGYPB-UHFFFAOYSA-N	negative	0	development
608	598-55-0	11722	COC(=O)N	Methyl carbamate	GTCAXTIRRLKXRU-UHFFFAOYSA-N	cancer-liver	1	development
609	609-20-1	11860	C1=C(C=C(C(=C1Cl)N)Cl)N	2,6-Dichloro-p-phenylenediamine	HQCHAOKWWKLXQH-UHFFFAOYSA-N	cancer-liver	1	development
610	611-23-4	11909	CC1=CC=CC=C1N=O	o-Nitrosotoluene	TWLBRQVYXPMCFK-UHFFFAOYSA-N	cancer-liver	1	development
611	611-32-5	11910	CC1=C2C(=CC=C1)C=CC=N2	8-Methylquinoline	JRLTTZUODKEYDH-UHFFFAOYSA-N	negative	0	development
612	614-00-6	11957	CN(C1=CC=CC=C1)N=O	Nitrosomethylaniline	MAXCWSIJKVASQC-UHFFFAOYSA-N	cancer-other	1	development
613	614-95-9	11977	CCN(C(=O)OCC)N=O	Nitrosoethylurethane	RAUQLNDTFONODT-UHFFFAOYSA-N	cancer-other	1	development
614	621-64-7	12130	CCCN(CCC)N=O	N-Nitrosodipropylamine	YLKFDHTUAUWZPQ-UHFFFAOYSA-N	cancer-liver	1	development
615	622-51-5	12148	CC1=CC=C(C=C1)NC(=O)N	p-Tolylurea	DMSHKWHLXNDUST-UHFFFAOYSA-N	cancer-other	1	development
616	624-84-0	12229	C(=O)NN	Formylhydrazine	XZBIXDPGRMLSTC-UHFFFAOYSA-N	cancer-other	1	development
617	628-94-4	12364	C(CCC(=O)N)CC(=O)N	Adipamide	GVNWZKBFMFUVNX-UHFFFAOYSA-N	negative	0	development
618	630-20-6	12418	C(C(Cl)(Cl)Cl)Cl	1,1,1,2-Tetrachloroethane	QVLAWKAXOMEXPM-UHFFFAOYSA-N	cancer-liver	1	development
619	634-93-5	12471	C1=C(C=C(C(=C1Cl)N)Cl)Cl	2,4,6-Trichloroaniline	NATVSFWWYVJTAZ-UHFFFAOYSA-N	cancer-liver	1	development
620	636-21-5	12484	CC1=CC=CC=C1N.Cl	o-Toluidine.HCl	OGVXWEOZQMAAIM-UHFFFAOYSA-N	cancer-liver	1	development
621	685-91-6	12703	CCN(CC)C(=O)C	Diethylacetamide	AJFDBNQQDYLMJN-UHFFFAOYSA-N	cancer-other	1	development
622	872-50-4	13387	CN1CCCC1=O	N-Methyl-2-pyrrolidone	SECXISVLQFMRJM-UHFFFAOYSA-N	negative	0	development
623	930-55-2	13591	C1CCN(C1)N=O	N-Nitrosopyrrolidine	WNYADZVDBIBLJJ-UHFFFAOYSA-N	cancer-liver	1	development
624	937-25-7	13641	CN(C1=CC=C(C=C1)F)N=O	N-Nitroso-N-methyl-4-fluoroaniline	GFIXPWIVPHYTAJ-UHFFFAOYSA-N	cancer-other	1	development
625	943-41-9	13671	CN(C1=CC=C(C=C1)[N+](=O)[O-])N=O	N-Nitroso-N-methyl-4-nitroaniline	AMTRFSFECFPSHF-UHFFFAOYSA-N	negative	0	development
626	999-81-5	13836	C[N+](C)(C)CCCl.[Cl-]	(2-Chloroethyl)trimethylammonium chloride	UHZZMRAGKVHANO-UHFFFAOYSA-M	negative	0	development
627	1116-54-7	14223	C(CO)N(CCO)N=O	N-Nitrosodiethanolamine	YFCDLVPYFMHRQZ-UHFFFAOYSA-N	cancer-liver	1	development
628	2164-09-2	16560	CC(=C)C(=O)NC1=CC(=C(C=C1)Cl)Cl	3,4'-Dichloro-2-methylacrylanilide	VCBRBUKGTWLJOB-UHFFFAOYSA-N	negative	0	development
629	2835-39-4	17816	CC(C)CC(=O)OCC=C	Allyl isovalerate	HOMAGVUCNZNWBC-UHFFFAOYSA-N	cancer-other	1	development
630	3068-88-0	18303	CC1CC(=O)O1	beta-Butyrolactone	GSCLMSFRWBPUSK-UHFFFAOYSA-N	cancer-other	1	development
631	3296-90-0	18692	C(C(CO)(CBr)CBr)O	2,2-Bis(bromomethyl)-1,3-propanediol, technical grade	CHUGKEQJSLOLHL-UHFFFAOYSA-N	negative	0	development
632	4164-28-7	20120	CN(C)[N+](=O)[O-]	Dimethylnitramine	XRWKADIRZXTTLH-UHFFFAOYSA-N	cancer-liver	1	development
633	4363-03-5	20376	C1=CC=C(C=C1)C2=CC(=C(C=C2)N)O	3-Hydroxy-4-aminobiphenyl	ILGJVPVZCNNBKI-UHFFFAOYSA-N	negative	0	development
634	4515-18-8	20614	C1CCN(C(C1)C(=O)O)N=O	Nitrosopipecolic acid	DSGKTUVITPQPRT-UHFFFAOYSA-N	negative	0	development
635	5632-47-3	21845	C1CN(CCN1)N=O	N-Nitrosopiperazine	CVTIZMOISGMZRJ-UHFFFAOYSA-N	cancer-other	1	development
636	123-33-1	21954	C1=CC(=O)NNC1=O	Maleic hydrazide	BGRDGMRNKXEXQD-UHFFFAOYSA-N	negative	0	development
637	13552-44-8	26108	C1=CC(=CC=C1CC2=CC=C(C=C2)N)N.Cl.Cl	4,4'-Methylenedianiline.2HCl	MXNNTNFLRICRPT-UHFFFAOYSA-N	cancer-liver	1	development
638	15481-70-6	27324	CC1=C(C=CC=C1N)N.Cl.Cl	2,6-Diaminotoluene.2HCl	LXIJUYQULXUMDO-UHFFFAOYSA-N	negative	0	development
639	16120-70-0	27690	CCCCN(C=O)N	N-n-Butyl-N-formylhydrazine	IUQLCQSKKGSTBR-UHFFFAOYSA-N	cancer-other	1	development
640	16338-97-9	27821	C=CCN(CC=C)N=O	Diallylnitrosamine	GRYFJBRXMFVEIL-UHFFFAOYSA-N	cancer-other	1	development
641	124-64-1	31298	C(O)[P+](CO)(CO)CO.[Cl-]	Tetrakis(hydroxymethyl)phosphonium chloride	AKXUUJCMWZFYMV-UHFFFAOYSA-M	negative	0	development
642	26541-51-5	33535	C1CSCCN1N=O	N-Nitrosothiomorpholine	OMDNEQQMLDYBTR-UHFFFAOYSA-N	cancer-other	1	development
643	26921-68-6	33646	CN(CCO)N=O	N-Nitrosomethyl-(2-hydroxyethyl) amine	GFOKXZBYAVRDMO-UHFFFAOYSA-N	cancer-liver	1	development
644	33868-17-6	36618	CN(C#N)N=O	Methylnitrosocyanamide	DHOYZNRIPLSCPT-UHFFFAOYSA-N	cancer-other	1	development
645	39156-41-7	38221	COC1=C(C=C(C=C1)N)N.OS(=O)(=O)O	2,4-Diaminoanisole sulfate	FDJQHYWUHGBBTO-UHFFFAOYSA-N	cancer-other	1	development
646	53609-64-6	40828	CC(CN(CC(C)O)N=O)O	N-Nitrosobis(2-hydroxypropyl)amine	MNIGYIKCFSPQRJ-UHFFFAOYSA-N	cancer-other	1	development
647	60391-92-6	43256	C(C(=O)O)N(C(=O)N)N=O	Carboxymethylnitrosourea	JWFMCQPAQYKFDP-UHFFFAOYSA-N	cancer-other	1	development
648	60599-38-4	43371	CC(=O)CN(CC(=O)C)N=O	N-Nitrosobis(2-oxopropyl)amine	AKRYBBWYDSDZHG-UHFFFAOYSA-N	cancer-liver	1	development
649	59-88-1	60962	C1=CC=C(C=C1)NN.Cl	Phenylhydrazine.HCl	JOVOSQBPPZZESK-UHFFFAOYSA-N	cancer-other	1	development
650	103-03-7	61002	C1=CC=C(C=C1)NNC(=O)N	1-Carbamyl-2-phenylhydrazine	AVKHCKXGKPAGEI-UHFFFAOYSA-N	cancer-other	1	development
651	30310-80-6	61873	C1[C@H](CN([C@@H]1C(=O)O)N=O)O	Nitrosohydroxyproline	ABVBOWJCKJGCJM-DMTCNVIQSA-N	negative	0	development
652	443-72-1	67955	CNC1=NC=NC2=C1NC=N2	(N-6)-Methyladenine	CKOMXBHMKXXTNW-UHFFFAOYSA-N	negative	0	development
653	3148-73-0	72884	CC(=O)NNC(=O)C	Diacetyl hydrazine	ZLHNYIHIHQEHJQ-UHFFFAOYSA-N	negative	0	development
654	3276-41-3	76762	C1C=CCON1N=O	3,6-Dihydro-2-nitroso-2H-1,2-oxazine	JRIFTVNYAPUKTK-UHFFFAOYSA-N	cancer-other	1	development
655	2629-59-6	92185	CCSC[C@@H](C(=O)O)N	S-Ethyl-l-cysteine	ULXKXLZEOGLCRJ-BYPYZUCNSA-N	negative	0	development
656	760-56-5	96019	C=CCN(C(=O)N)N=O	1-Allyl-1-nitrosourea	WBBDVRPSJSJSPC-UHFFFAOYSA-N	cancer-other	1	development
657	6965-71-5	97971	CC(C(=O)O)OC1=C(C=CC(=C1)Cl)Cl	alpha-(2,5-Dichlorophenoxy)propionic acid	LDRYOEIGQCIMEK-UHFFFAOYSA-N	negative	0	development
658	1701-77-5	107202	COC(C1=CC=CC=C1)C(=O)O	Methoxyphenylacetic acid	DIWVBIXQCNRCFE-UHFFFAOYSA-N	negative	0	development
659	75411-83-5	107719	CC(CN(C)N=O)O	N-Nitrosomethyl-2-hydroxypropylamine	SJPQUECDNWANFT-UHFFFAOYSA-N	cancer-other	1	development
660	520-45-6	122903	CC1=CC(=O)C(C(=O)O1)C(=O)C	3-Acetyl-6-methyl-2,4-pyrandione	PGRHXDWITVMQBC-UHFFFAOYSA-N	negative	0	development
661	91308-70-2	124480	CC(CN(CC=C)N=O)O	N-Nitrosoallyl-2-hydroxypropylamine	NLJASJZSFGKTQT-UHFFFAOYSA-N	cancer-liver	1	development
662	69658-91-9	125780	CN(C1=CN=CC=C1)N=O	3-Nitrosomethylaminopyridine	GOPFSGIKKZFUJK-UHFFFAOYSA-N	negative	0	development
663	70415-59-7	125833	CN(CCCO)N=O	N-Nitrosomethyl-(3-hydroxypropyl) amine	DNPICXVYNIZRFB-UHFFFAOYSA-N	cancer-liver	1	development
664	69112-98-7	135419	C(CF)N(C(=O)N)N=O	2-Fluoroethyl-nitrosourea	CVNSFWDAXAKBIM-UHFFFAOYSA-N	cancer-other	1	development
665	20570-96-1	146540	C1=CC=C(C=C1)CNN.Cl.Cl	Benzylhydrazine.2HCl	MSJHOJKVMMEMNX-UHFFFAOYSA-N	cancer-other	1	development
666	89911-79-5	150285	CC(CN(CC(CO)O)N=O)O	N-Nitroso-2,3-dihydroxypropyl-2-hydroxypropylamine	FKZLAQOTFPPENP-UHFFFAOYSA-N	cancer-other	1	development
667	56393-22-7	151324	CC(CN(C)C1=NN=C(C=C1)NN)O.Cl.Cl	Pildralazine	ZEJHFYVAMIWPTN-UHFFFAOYSA-N	negative	0	development
668	78776-28-0	156920	CCCCNNCCCC.Cl.Cl	1,2-di-n-Butylhydrazine.2HCl	CPWKROHLZUZJCB-UHFFFAOYSA-N	cancer-other	1	development
669	30418-53-2	160188	C=CC(=O)C1=CC2=C(C=C1)OCO2	1'-Oxosafrole	LNOUMTOCQWMBOJ-UHFFFAOYSA-N	negative	0	development
670	16301-26-1	519246	CCN=[N+](CC)[O-]	Z-Ethyl-O,N,N-azoxyethane	SZOHWYCBDJPVGO-UHFFFAOYSA-N	cancer-liver	1	development
671	110-57-6	642197	C(/C=C/CCl)Cl	trans-1,4-Dichlorobutene-2	FQDIANVAWVHZIR-OWOJBTEDSA-N	cancer-other	1	development
672	51-52-5	657298	CCCC1=CC(=O)NC(=S)N1	Propylthiouracil	KNAHARQHSZJURB-UHFFFAOYSA-N	cancer-other	1	development
673	86-88-4	736366	C1=CC=C2C(=C1)C=CC=C2NC(=S)N	1-(1-Naphthyl)-2-thiourea	PIVQQUNOTICCSA-UHFFFAOYSA-N	negative	0	development
674	141-90-2	1269845	C1=CNC(=S)NC1=O	Thiouracil	ZEMGGZBWXRYJHK-UHFFFAOYSA-N	cancer-liver	1	development
675	96-45-7	2723650	C1CNC(=S)N1	Ethylene thiourea	PDQAZBWRQCGBEV-UHFFFAOYSA-N	cancer-liver	1	development
676	87-56-9	2771871	C(=O)/C(=C(\C(=O)O)/Cl)/Cl	alpha,beta-Dichloro-beta-formylacrylic acid	LUMLZKVIXLWTCI-IHWYPQMZSA-N	negative	0	development
677	2489-77-2	2779938	CNC(=S)N(C)C	Trimethylthiourea	JAEZSIYNWDWMMN-UHFFFAOYSA-N	cancer-other	1	development
678	142-59-6	3032297	C(CNC(=S)[S-])NC(=S)[S-].[Na+].[Na+]	Ethylenebisdithiocarbamate, disodium	UQJQVUOTMVCFHX-UHFFFAOYSA-L	negative	0	development
679	56222-35-6	3034827	C1CN(CC1O)N=O	N-Nitroso-3-hydroxypyrrolidine	XDZKGLWJXJTZJZ-UHFFFAOYSA-N	cancer-other	1	development
680	56894-92-9	3085116	C(CCCOCCl)CCOCCl	Bis-1,6-(chloromethoxy)hexane	QHEYFBGFAQOPBZ-UHFFFAOYSA-N	negative	0	development
681	119-34-6	3417419	C1=CC(=C(C=C1N)[N+](=O)[O-])O	4-Amino-2-nitrophenol	WHODQVWERNSQEO-UHFFFAOYSA-N	cancer-other	1	development
682	92177-49-6	3794522	CC(=O)CN(CCO)N=O	Nitroso-2-oxopropylethanolamine	PTFPKIPNOCKCFE-UHFFFAOYSA-N	cancer-liver	1	development
683	5307-14-2	4338370	C1=CC(=C(C=C1N)[N+](=O)[O-])N	2-Nitro-p-phenylenediamine	HVHNMNGARPCGGD-UHFFFAOYSA-N	cancer-liver	1	development
684	15973-99-6	4338381	C1CN(CN(C1)N=O)N=O	di(N-Nitroso)-perhydropyrimidine	JSPJZBZNGPDBLH-UHFFFAOYSA-N	cancer-other	1	development
685	2185-92-4	5284347	C1=CC=C(C=C1)C2=CC=CC=C2N.Cl	2-Biphenylamine.HCl	QHYYXPLERUSFAV-UHFFFAOYSA-N	cancer-other	1	development
686	14026-03-0	5284423	C[C@@H]1CCCCN1N=O	R(-)-2-Methyl-N-nitrosopiperidine	SSPVLHFEMWOTGD-ZCFIWIBFSA-N	cancer-other	1	development
687	1119-68-2	5284438	CCCCCNN.Cl	n-Pentylhydrazine.HCl	OUHMCZPSMWROKK-UHFFFAOYSA-N	cancer-other	1	development
688	61-76-7	5284443	CNC[C@@H](C1=CC(=CC=C1)O)O.Cl	Phenylephrine.HCl	OCYSGIYOVXAGKQ-FVGYRXGTSA-N	negative	0	development
689	56795-66-5	5284450	CCCNN.Cl	Propylhydrazine.HCl	VWNFFIGQDGOCIA-UHFFFAOYSA-N	cancer-other	1	development
690	134-72-5	5359318	C[C@@H]([C@@H](C1=CC=CC=C1)O)NC.C[C@@H]([C@@H](C1=CC=CC=C1)O)NC.OS(=O)(=O)O	Ephedrine sulphate	CAVQBDOACNULDN-KHFUBBAMSA-N	negative	0	development
691	2411-74-7	9570107	C1=COC(=C1)/C=N/NC(=O)N	2-Furaldehyde semicarbazone	BAOXJBYPTRZNSH-XBXARRHUSA-N	negative	0	development
692	32607-00-4	23681167	C(C(=O)O)NCC(=O)[O-].[Na+]	Iminodiacetic acid, monosodium	YMUIJWOIZMVBQZ-UHFFFAOYSA-M	negative	0	development
693	97-00-7	6	C1=CC(=C(C=C1[N+](=O)[O-])[N+](=O)[O-])Cl	1-Chloro-2,4-dinitrobenzene	VYZAHLCBVHPDDF-UHFFFAOYSA-N	negative	0	test
694	107-06-2	11	C(CCl)Cl	1,2-Dichloroethane	WSLDOOZREJYCGB-UHFFFAOYSA-N	cancer-other	1	test
695	107-20-0	33	C(C=O)Cl	Chloroacetaldehyde	QSKPIOLLBIHNAC-UHFFFAOYSA-N	cancer-liver	1	test
696	107-21-1	174	C(CO)O	Ethylene glycol	LYCAIKOWRPUZTN-UHFFFAOYSA-N	negative	0	test
697	75-07-0	177	CC=O	Acetaldehyde	IKHGUXGNUITLKF-UHFFFAOYSA-N	cancer-other	1	test
698	60-35-5	178	CC(=O)N	Acetamide	DLFVBJFMPXGRIB-UHFFFAOYSA-N	cancer-liver	1	test
699	100-52-7	240	C1=CC=C(C=C1)C=O	Benzaldehyde	HUMNYLRZRPPJDN-UHFFFAOYSA-N	negative	0	test
700	79-11-8	300	C(C(=O)O)Cl	Monochloroacetic acid	FOCAUTSVDIKZOP-UHFFFAOYSA-N	negative	0	test
701	79-46-9	398	CC(C)[N+](=O)[O-]	2-Nitropropane	FGLBSLMDCBOPQK-UHFFFAOYSA-N	negative	0	test
702	64-17-5	702	CCO	Ethyl alcohol	LFQSCWFLJHTTHZ-UHFFFAOYSA-N	cancer-liver	1	test
703	123-31-9	785	C1=CC(=CC=C1O)O	Hydroquinone	QIGBRXMKCJKVMJ-UHFFFAOYSA-N	cancer-liver	1	test
704	98-92-0	936	C1=CC(=CN=C1)C(=O)N	Nicotinamide	DFPAKSUCGFBDDF-UHFFFAOYSA-N	negative	0	test
705	108-95-2	996	C1=CC=C(C=C1)O	Phenol	ISWSIDIOOBJBQZ-UHFFFAOYSA-N	negative	0	test
706	57-55-6	1030	CC(CO)O	Propylene glycol	DNIAPMSPPWPWGF-UHFFFAOYSA-N	negative	0	test
707	98-96-4	1046	C1=CN=C(C=N1)C(=O)N	Pyrazinamide	IPEHBUMCGVEMRF-UHFFFAOYSA-N	negative	0	test
708	108-88-3	1140	CC1=CC=CC=C1	Toluene	YXFVVABEGXRONW-UHFFFAOYSA-N	cancer-other	1	test
709	57-13-6	1176	C(=O)(N)N	Urea	XSQUKJJJFZCRTK-UHFFFAOYSA-N	negative	0	test
710	93-76-5	1480	C1=C(C(=CC(=C1Cl)Cl)Cl)OCC(=O)O	2,4,5-Trichlorophenoxyacetic acid	SMYMJHWAQXWPDB-UHFFFAOYSA-N	negative	0	test
711	57-57-8	2365	C1COC1=O	beta-Propiolactone	VEZXCJBBBCKRPI-UHFFFAOYSA-N	cancer-other	1	test
712	330-54-1	3120	CN(C)C(=O)NC1=CC(=C(C=C1)Cl)Cl	3-(3,4-Dichlorophenyl)-1,1-dimethylurea	XMTQQYYKAHVGBJ-UHFFFAOYSA-N	negative	0	test
713	51-21-8	3385	C1=C(C(=O)NC(=O)N1)F	5-Fluorouracil	GHASVSINZRGABV-UHFFFAOYSA-N	cancer-other	1	test
714	144-48-9	3727	C(C(=O)N)I	Iodoacetamide	PGLTVOMIXTUURA-UHFFFAOYSA-N	negative	0	test
715	26675-46-7	3763	C(C(F)(F)F)(OC(F)F)Cl	Isoflurane	PIWKPBJCKXDKJR-UHFFFAOYSA-N	negative	0	test
716	54-85-3	3767	C1=CN=CC=C1C(=O)NN	Isoniazid	QRXWMOHMRWLFEY-UHFFFAOYSA-N	cancer-liver	1	test
717	108-46-3	5054	C1=CC(=CC(=C1)O)O	Resorcinol	GHMLBKRAJCXXBS-UHFFFAOYSA-N	negative	0	test
718	51-79-6	5641	CCOC(=O)N	Urethane	JOYRKODLDBILNP-UHFFFAOYSA-N	cancer-liver	1	test
719	55-18-5	5921	CCN(CC)N=O	N-Nitrosodiethylamine	WBNQDOYYEUMPFS-UHFFFAOYSA-N	cancer-liver	1	test
720	55-22-1	5922	C1=CN=CC=C1C(=O)O	Isonicotinic acid	TWBYWOBDOCUKOW-UHFFFAOYSA-N	negative	0	test
721	59-89-2	6046	C1COCCN1N=O	N-Nitrosomorpholine	ZKXDGKXYMTYWTB-UHFFFAOYSA-N	cancer-liver	1	test
722	60-34-4	6061	CNN	Methylhydrazine	HDZGCSFEDULWCS-UHFFFAOYSA-N	cancer-liver	1	test
723	62-75-9	6124	CN(C)N=O	N-Nitrosodimethylamine	UMFJAHHVKNCGLG-UHFFFAOYSA-N	cancer-liver	1	test
724	67-48-1	6209	C[N+](C)(C)CCO.[Cl-]	Choline chloride	SGMZJAMFUVOLNK-UHFFFAOYSA-M	negative	0	test
725	67-66-3	6212	C(Cl)(Cl)Cl	Chloroform	HEDRZPFGACZZDS-UHFFFAOYSA-N	cancer-liver	1	test
726	74-96-4	6332	CCBr	Bromoethane	RDHPKYGYEGBMSE-UHFFFAOYSA-N	cancer-other	1	test
727	75-00-3	6337	CCCl	Chloroethane	HRYZWHHZPQKTII-UHFFFAOYSA-N	cancer-other	1	test
728	75-01-4	6338	C=CCl	Vinyl chloride	BZHJMEDXRYGGRV-UHFFFAOYSA-N	cancer-liver	1	test
729	75-09-2	6344	C(Cl)Cl	Methylene chloride	YMWUJEATGCHHMB-UHFFFAOYSA-N	cancer-liver	1	test
730	75-21-8	6354	C1CO1	Ethylene oxide	IAYPIBMASNFSPL-UHFFFAOYSA-N	cancer-other	1	test
731	75-27-4	6359	C(Cl)(Cl)Br	Bromodichloromethane	FMWLUWPQPKEARP-UHFFFAOYSA-N	cancer-liver	1	test
732	75-34-3	6365	CC(Cl)Cl	1,1-Dichloroethane	SCYULBFZEHDVBN-UHFFFAOYSA-N	cancer-other	1	test
733	75-35-4	6366	C=C(Cl)Cl	Vinylidene chloride	LGXVIGDEPROXKC-UHFFFAOYSA-N	cancer-liver	1	test
734	75-45-6	6372	C(F)(F)Cl	Chlorodifluoromethane	VOPWNXZWBYDODV-UHFFFAOYSA-N	negative	0	test
735	75-69-4	6389	C(F)(Cl)(Cl)Cl	Trichlorofluoromethane	CYRMSUTZVYGINF-UHFFFAOYSA-N	negative	0	test
736	79-00-5	6574	C(C(Cl)Cl)Cl	1,1,2-Trichloroethane	UBOXGVDOUJQMTN-UHFFFAOYSA-N	cancer-liver	1	test
737	79-06-1	6579	C=CC(=O)N	Acrylamide	HRPVXLWXLXDGHG-UHFFFAOYSA-N	cancer-other	1	test
738	79-34-5	6591	C(C(Cl)Cl)(Cl)Cl	1,1,2,2-Tetrachloroethane	QPFMBZIOSGYJDE-UHFFFAOYSA-N	cancer-liver	1	test
739	79-43-6	6597	C(C(=O)O)(Cl)Cl	Dichloroacetic acid	JXTHNDFMNIQAHM-UHFFFAOYSA-N	cancer-liver	1	test
740	79-44-7	6598	CN(C)C(=O)Cl	Dimethylcarbamyl chloride	YIIMEMSDCNDGTB-UHFFFAOYSA-N	cancer-other	1	test
741	6334-11-8	6913	CC1=CC(=C(C(=C1)C)N)C	2,4,6-Trimethylaniline.HCl	KWVPRPSXBZNOHS-UHFFFAOYSA-N	cancer-liver	1	test
742	88-06-2	6914	C1=C(C=C(C(=C1Cl)O)Cl)Cl	2,4,6-Trichlorophenol	LINPIYWFGCPVIE-UHFFFAOYSA-N	cancer-liver	1	test
743	91-62-3	7059	CC1=CC2=C(C=C1)N=CC=C2	6-Methylquinoline	LUYISICIYVKBTA-UHFFFAOYSA-N	negative	0	test
744	95-74-9	7255	CC1=C(C=C(C=C1)N)Cl	3-Chloro-p-toluidine	RQKFYFNZSHWXAW-UHFFFAOYSA-N	negative	0	test
745	95-83-0	7263	C1=CC(=C(C=C1Cl)N)N	4-Chloro-o-phenylenediamine	BXIXXXYDDJVHDL-UHFFFAOYSA-N	cancer-liver	1	test
746	96-18-4	7285	C(C(CCl)Cl)Cl	1,2,3-Trichloropropane	CFXQEHVMCRXUSD-UHFFFAOYSA-N	cancer-liver	1	test
747	96-24-2	7290	C(C(CCl)O)O	Glycerol alpha-monochlorohydrin	SSZWWUDQMAHNAQ-UHFFFAOYSA-N	negative	0	test
748	100-00-5	7474	C1=CC(=CC=C1[N+](=O)[O-])Cl	1-Chloro-4-nitrobenzene	CZGCEKJOLUNIFY-UHFFFAOYSA-N	cancer-liver	1	test
749	100-41-4	7500	CCC1=CC=CC=C1	Ethylbenzene	YNQLUTRBYVCPMQ-UHFFFAOYSA-N	cancer-other	1	test
750	100-42-5	7501	C=CC1=CC=CC=C1	Styrene	PPBRXRYQALVLMV-UHFFFAOYSA-N	cancer-other	1	test
751	100-44-7	7503	C1=CC=C(C=C1)CCl	Benzyl chloride	KCXMKQUNVWSEMD-UHFFFAOYSA-N	cancer-other	1	test
752	100-75-4	7526	C1CCN(CC1)N=O	N-Nitrosopiperidine	UWSDONTXWQOZFN-UHFFFAOYSA-N	cancer-liver	1	test
753	101-14-4	7543	C1=CC(=C(C=C1CC2=CC(=C(C=C2)N)Cl)Cl)N	4,4'-Methylene-bis(2-chloroaniline)	IBOFVQJTBBUKMU-UHFFFAOYSA-N	cancer-liver	1	test
754	102-50-1	7610	CC1=C(C=CC(=C1)OC)N	m-Cresidine	CDGNLUSBENXDGG-UHFFFAOYSA-N	cancer-other	1	test
755	105-60-2	7768	C1CCC(=O)NCC1	Caprolactam	JBKVHLHDHHXQEQ-UHFFFAOYSA-N	negative	0	test
756	106-50-3	7814	C1=CC(=CC=C1N)N	p-Phenylenediamine	CBCKQZAAMUWICA-UHFFFAOYSA-N	negative	0	test
757	106-88-7	7834	CCC1CO1	1,2-Epoxybutane	RBACIKXCRWGCBB-UHFFFAOYSA-N	cancer-other	1	test
758	106-99-0	7845	C=CC=C	1,3-Butadiene	KAKZBPTYRLMSJV-UHFFFAOYSA-N	cancer-liver	1	test
759	107-05-1	7850	C=CCCl	Allyl chloride	OSDWBNJEKMUWAV-UHFFFAOYSA-N	cancer-other	1	test
760	107-13-1	7855	C=CC#N	Acrylonitrile	NLHHRLWOUZZQLW-UHFFFAOYSA-N	cancer-other	1	test
761	107-30-2	7864	COCCl	Chloromethyl methyl ether	XJUZRXYOEPSWMB-UHFFFAOYSA-N	cancer-other	1	test
762	108-01-0	7902	CN(C)CCO	2-Dimethylaminoethanol	UEEJHVSXFDXPFK-UHFFFAOYSA-N	negative	0	test
763	108-03-2	7903	CCC[N+](=O)[O-]	1-Nitropropane	JSZOAYXJRCEYSX-UHFFFAOYSA-N	negative	0	test
764	108-05-4	7904	CC(=O)OC=C	Vinyl acetate	XTXRWKRVRITETP-UHFFFAOYSA-N	cancer-liver	1	test
765	108-45-2	7935	C1=CC(=CC(=C1)N)N	m-Phenylenediamine	WZCQRUWWHSTZEM-UHFFFAOYSA-N	negative	0	test
766	108-90-7	7964	C1=CC=C(C=C1)Cl	Chlorobenzene	MVPPADPHJFYWMZ-UHFFFAOYSA-N	negative	0	test
767	109-69-3	8005	CCCCCl	n-Butyl chloride	VFWCMGCRMGJXDK-UHFFFAOYSA-N	negative	0	test
768	109-84-2	8017	C(CO)NN	2-Hydroxyethylhydrazine	GBHCABUWWQUMAJ-UHFFFAOYSA-N	cancer-liver	1	test
769	110-97-4	8086	CC(CNCC(C)O)O	Bis(2-hydroxypropyl)amine	LVTYICIALWPMFW-UHFFFAOYSA-N	negative	0	test
770	111-44-4	8115	C(CCl)OCCCl	Bis-2-chloroethylether	ZNSMNVMLTJELDZ-UHFFFAOYSA-N	cancer-liver	1	test
771	115-07-1	8252	CC=C	Propylene	QQONPFPTGQHPMA-UHFFFAOYSA-N	negative	0	test
772	120-36-5	8427	CC(C(=O)O)OC1=C(C=C(C=C1)Cl)Cl	alpha-(2,4-Dichlorophenoxy)propionic acid	MZHCENGPTKEIGP-UHFFFAOYSA-N	negative	0	test
773	120-83-2	8449	C1=CC(=C(C=C1Cl)Cl)O	2,4-Dichlorophenol	HFZWRUODUSTPEG-UHFFFAOYSA-N	negative	0	test
774	120-93-4	8453	C1CNC(=O)N1	Ethylene urea	YAMHXTCMCPHKLN-UHFFFAOYSA-N	negative	0	test
775	134-29-2	8638	COC1=CC=CC=C1N.Cl	o-Anisidine.HCl	XCZCWGVXRBJCCD-UHFFFAOYSA-N	cancer-other	1	test
776	137-09-7	8715	C1=CC(=C(C=C1N)N)O.Cl.Cl	2,4-Diaminophenol.2HCl	KQEIJFWAXDQUPR-UHFFFAOYSA-N	negative	0	test
777	140-88-5	8821	CCOC(=O)C=C	Ethyl acrylate	JIGUQPWFLRLWPJ-UHFFFAOYSA-N	cancer-other	1	test
778	306-37-6	9380	CNNC.Cl.Cl	1,2-Dimethylhydrazine.2HCl	WLDRFJDGKMTPPV-UHFFFAOYSA-N	cancer-other	1	test
779	513-37-1	10555	CC(=CCl)C	Dimethylvinyl chloride	KWISWUFGPUHDRY-UHFFFAOYSA-N	cancer-other	1	test
780	540-23-8	10891	CC1=CC=C(C=C1)N.Cl	p-Toluidine.HCl	JQKBUTDZZRGQDR-UHFFFAOYSA-N	cancer-liver	1	test
781	540-51-2	10898	C(CBr)O	Bromoethanol	LDLCZOVUSADOIV-UHFFFAOYSA-N	cancer-other	1	test
782	542-88-1	10967	C(OCCl)Cl	Bis-(chloromethyl)ether	HRQGCQVOJVTVLU-UHFFFAOYSA-N	cancer-other	1	test
783	563-41-7	11236	C(=O)(N)NN.Cl	Carbamyl hydrazine.HCl	XHQYBDSXTDXSHY-UHFFFAOYSA-N	cancer-other	1	test
784	592-31-4	11595	CCCCNC(=O)N	N-Butylurea	CNWSQCLBDWYLAN-UHFFFAOYSA-N	negative	0	test
785	593-60-2	11641	C=CBr	Vinyl bromide	INLLPKCGLOXCIV-UHFFFAOYSA-N	cancer-liver	1	test
786	593-70-4	11643	C(F)Cl	Chlorofluoromethane	XWCDCDSDNJVCLO-UHFFFAOYSA-N	cancer-other	1	test
787	613-94-5	11955	C1=CC=C(C=C1)C(=O)NN	Benzoyl hydrazine	WARCRYXKINZHGQ-UHFFFAOYSA-N	cancer-other	1	test
788	615-28-1	11990	C1=CC=C(C(=C1)N)N.Cl.Cl	o-Phenylenediamine.2HCl	RIIWUGSYXOBDMC-UHFFFAOYSA-N	cancer-liver	1	test
789	619-17-0	12076	C1=CC(=C(C=C1[N+](=O)[O-])N)C(=O)O	4-Nitroanthranilic acid	UEALKTCRMBVTFN-UHFFFAOYSA-N	negative	0	test
790	622-97-9	12161	CC1=CC=C(C=C1)C=C	p-Methylstyrene	JLBJTVDPSNHSKJ-UHFFFAOYSA-N	negative	0	test
791	628-02-4	12332	CCCCCC(=O)N	Hexanamide	ALBYIUDWACNRRB-UHFFFAOYSA-N	cancer-other	1	test
792	758-17-8	12962	CN(C=O)N	N-Methyl-N-formylhydrazine	RSFOTOSOKJMMCB-UHFFFAOYSA-N	cancer-liver	1	test
793	765-34-4	13002	C1C(O1)C=O	Glycidaldehyde	IWYRWIUNAVNFPE-UHFFFAOYSA-N	negative	0	test
794	816-57-9	13157	CCCN(C(=O)N)N=O	N-Propyl-N-nitrosourea	YGGSSUISOYLCBF-UHFFFAOYSA-N	cancer-other	1	test
795	869-01-2	13362	CCCCN(C(=O)N)N=O	N-n-Butyl-N-nitrosourea	LSWOCDLIYSKTRX-UHFFFAOYSA-N	cancer-other	1	test
796	924-42-5	13543	C=CC(=O)NCO	N-Methylolacrylamide	CNCOEDDPFOAUMB-UHFFFAOYSA-N	cancer-liver	1	test
797	1068-57-1	14039	CC(=O)NN	Monoacetyl hydrazine	OFLXLNCGODUUOT-UHFFFAOYSA-N	cancer-other	1	test
798	1453-82-3	15074	C1=CN=CC=C1C(=O)N	Isonicotinamide	VFQXVTODMYMSMJ-UHFFFAOYSA-N	negative	0	test
799	3165-93-3	18487	CC1=C(C=CC(=C1)Cl)N.Cl	4-Chloro-o-toluidine.HCl	VKYZDCTWJGBFDW-UHFFFAOYSA-N	cancer-other	1	test
800	4106-66-5	20061	C1=CC=C2C(=C1)C3=C(O2)C=C(C=C3)N	3-Dibenzofuranamine	GHQCIALFYKYZGS-UHFFFAOYSA-N	cancer-other	1	test
801	4247-02-3	20240	CC(C)COC(=O)C1=CC=C(C=C1)O	Isobutyl p-hydroxybenzoate	XPJVKCRENWUEJH-UHFFFAOYSA-N	negative	0	test
802	5131-60-2	21209	C1=CC(=C(C=C1N)N)Cl	4-Chloro-m-phenylenediamine	ZWUBBMDHSZDNTA-UHFFFAOYSA-N	cancer-liver	1	test
803	5164-11-4	21242	C=CCN(CC=C)N	1,1-Diallylhydrazine	UPVLRUMEBXYJMQ-UHFFFAOYSA-N	cancer-other	1	test
804	6369-59-1	22856	CC1=C(C=CC(=C1)N)N.OS(=O)(=O)O	2,5-Diaminotoluene sulfate	KZTWOUOZKZQDMN-UHFFFAOYSA-N	negative	0	test
805	6959-47-3	23392	C1=CC=NC(=C1)CCl.Cl	2-(Chloromethyl)pyridine.HCl	JPMRGPPMXHGKRO-UHFFFAOYSA-N	negative	0	test
806	6959-48-4	23394	C1=CC(=CN=C1)CCl.Cl	3-(Chloromethyl)pyridine.HCl	UZGLOGCJCWBBIV-UHFFFAOYSA-N	cancer-other	1	test
807	7572-29-4	24227	C(#CCl)Cl	Dichloroacetylene	ZMJOVJSTYLQINE-UHFFFAOYSA-N	cancer-liver	1	test
808	542-75-6	24726	C(/C=C/Cl)Cl	Telone II	UOORRWUZONOOLO-OWOJBTEDSA-N	cancer-liver	1	test
809	10595-95-6	25418	CCN(C)N=O	Nitrosoethylmethylamine	RTDCJKARQCRONF-UHFFFAOYSA-N	cancer-liver	1	test
810	13073-35-3	25674	CCSCC[C@@H](C(=O)O)N	Ethionine	GGLZPLKKBSSKCX-YFKPBYRVSA-N	cancer-liver	1	test
811	15805-73-9	27492	C=COC(=O)N	Vinyl carbamate	LVLANIHJQRZTPY-UHFFFAOYSA-N	cancer-liver	1	test
812	18413-14-4	29061	CCNN.Cl	Ethylhydrazine.HCl	SKEHVMZPBBGBAO-UHFFFAOYSA-N	cancer-other	1	test
813	123-91-1	31275	C1COCCO1	1,4-Dioxane	RYHBNJHYFVUHQT-UHFFFAOYSA-N	cancer-liver	1	test
814	127-18-4	31373	C(=C(Cl)Cl)(Cl)Cl	Tetrachloroethylene	CYTYCFOTNPOANT-UHFFFAOYSA-N	cancer-liver	1	test
815	25843-45-2	33184	CN=[N+](C)[O-]	Azoxymethane	DGAKHGXRMXWHBX-UHFFFAOYSA-N	cancer-liver	1	test
816	55556-92-8	41470	C1CN(CC=C1)N=O	Nitroso-1,2,3,6-tetrahydropyridine	KIUHZRUPPGAVPY-UHFFFAOYSA-N	cancer-liver	1	test
817	74920-78-8	53145	CCN(C=O)N	N-Ethyl-N-formylhydrazine	NMLIDGSGENKDLB-UHFFFAOYSA-N	cancer-liver	1	test
818	77337-54-3	53657	CCCN(C=O)N	N-N'-Propyl-N-formylhydrazine	JNTNNUXPPZAEFD-UHFFFAOYSA-N	cancer-liver	1	test
819	127-06-0	67180	CC(=NO)C	Acetoxime	PXAJQJMDEXJWFB-UHFFFAOYSA-N	cancer-liver	1	test
820	636-79-3	71558	C1=CC(=CN=C1)C(=O)O.Cl	Nicotine.HCl	IBTWUVRCFHJPKN-UHFFFAOYSA-N	negative	0	test
821	6294-89-9	80519	COC(=O)NN	Methyl carbazate	WFJRIDQGVSJLLH-UHFFFAOYSA-N	negative	0	test
822	21436-96-4	88898	CC1=CC(=C(C=C1)N)C.Cl	2,4-Xylidine.HCl	HFXISSJBRAPVLG-UHFFFAOYSA-N	cancer-other	1	test
823	38434-77-4	93203	CCN(C#N)N=O	Ethylnitrosocyanamide	LMIMSGCBKHFTDY-UHFFFAOYSA-N	cancer-other	1	test
824	56795-65-4	93308	CCCCNN.Cl	n-Butylhydrazine.HCl	GXXOBXPRDUPYEJ-UHFFFAOYSA-N	cancer-other	1	test
825	40548-68-3	94506	C1CCON(C1)N=O	Tetrahydro-2-nitroso-2H-1,2-oxazine	PREXGTBZMLDXHV-UHFFFAOYSA-N	cancer-other	1	test
826	51786-53-9	94546	CC1=CC(=C(C=C1)C)N.Cl	2,5-Xylidine.HCl	XMHFVPVDKGNKPL-UHFFFAOYSA-N	cancer-liver	1	test
827	55984-51-5	104910	CC(=O)CN(C)N=O	N-Nitrosomethyl(2-oxopropyl)amine	CWULQTRBZMJZEG-UHFFFAOYSA-N	cancer-liver	1	test
828	17157-48-1	105131	C(C=O)Br	Bromoacetaldehyde	NMPVEAUIHMEAQP-UHFFFAOYSA-N	negative	0	test
829	67587-52-4	107887	C1COC(CN1N=O)O	N-Nitroso-2-hydroxymorpholine	NIRHEGBBHNJANV-UHFFFAOYSA-N	negative	0	test
830	612-82-8	108938	CC1=C(C=CC(=C1)C2=CC(=C(C=C2)N)C)N.Cl.Cl	3,3'-Dimethylbenzidine.2HCl	LUKPNZHXJRJBAN-UHFFFAOYSA-N	cancer-liver	1	test
831	17697-55-1	123376	CCCN=[N+](CCC)[O-]	1-Azoxypropane	NOLAXNLVEYHWHM-UHFFFAOYSA-N	cancer-other	1	test
832	91308-71-3	124481	CC(=O)CN(CC=C)N=O	N-Nitrosoallyl-2-oxopropylamine	MATYBIXNDNXYMI-UHFFFAOYSA-N	cancer-liver	1	test
833	96806-34-7	124537	C(CCl)NC(=O)N(CCO)N=O	1-Nitroso-1-hydroxyethyl-3-chloroethylurea	ZUXJWNFAYDAZJB-UHFFFAOYSA-N	cancer-liver	1	test
834	62641-67-2	124937	CC1CN(C(=O)NC1=O)N=O	1-Nitroso-5,6-dihydrothymine	VHNPZOQVSSWOJZ-UHFFFAOYSA-N	negative	0	test
835	86451-37-8	128823	CN(CC(CO)O)N=O	N-Nitrosomethyl-2,3-dihydroxypropylamine	YHOZMWRNWDWYKJ-UHFFFAOYSA-N	cancer-liver	1	test
836	114282-83-6	130741	C1N(CSCS1)N=O	N-Nitrosodithiazine	HAGCCDDROWPBPR-UHFFFAOYSA-N	negative	0	test
837	683-50-1	135440	CC(C=O)Cl	2-Chloropropanal	UAARVZGODBESIF-UHFFFAOYSA-N	cancer-other	1	test
838	16219-98-0	146270	CN(C1=CC=CC=N1)N=O	2-Nitrosomethylaminopyridine	WJDNMDMNPIKDCP-UHFFFAOYSA-N	cancer-other	1	test
839	16219-99-1	146271	CN(C1=CC=NC=C1)N=O	4-Nitrosomethylaminopyridine	CNXCLASNZDZCBC-UHFFFAOYSA-N	negative	0	test
840	57497-34-4	152014	CCN=[N+](C)[O-]	Z-Methyl-O,N,N-azoxyethane	JPBFRFFNPXMVOJ-UHFFFAOYSA-N	cancer-liver	1	test
841	57497-29-7	152160	CC[N+](=NC)[O-]	Z-Ethyl-O,N,N-azoxymethane	MIJJGTDCQRHTPM-UHFFFAOYSA-N	cancer-liver	1	test
842	26072-78-6	168474	C=CCNNCC=C.Cl.Cl	1,2-Diallylhydrazine.2HCl	BHPSYESZOZTFCG-UHFFFAOYSA-N	cancer-other	1	test
843	52207-83-7	171127	C=CCNN.Cl	Allylhydrazine.HCl	PWGPATVPEGLIAN-UHFFFAOYSA-N	cancer-other	1	test
844	598-57-2	421670	CN[N+](=O)[O-]	Methylnitramine	ARCZSDSOONGBRX-UHFFFAOYSA-N	cancer-other	1	test
845	123-73-9	447466	C/C=C/C=O	Crotonaldehyde	MLUCVPSAIODCQM-NSCUHMNNSA-N	cancer-liver	1	test
846	540-72-7	516871	C(#N)[S-].[Na+]	Thiocyanate, sodium	VGTPCRGMBIAPIM-UHFFFAOYSA-M	negative	0	test
847	144-55-8	516892	C(=O)(O)[O-].[Na+]	Sodium bicarbonate	UIIMBOGNXHQVGW-UHFFFAOYSA-M	negative	0	test
848	532-32-1	517055	C1=CC=C(C=C1)C(=O)[O-].[Na+]	Benzoate, sodium	WXMKPNITSTVMEF-UHFFFAOYSA-M	negative	0	test
849	638-03-9	522105	CC1=CC(=CC=C1)N.Cl	m-Toluidine.HCl	VDXZPXIEEVOGLV-UHFFFAOYSA-N	cancer-liver	1	test
850	104-46-1	637563	C/C=C/C1=CC=C(C=C1)OC	Anethole	RUVINXPYWBROJD-ONEGZZNKSA-N	negative	0	test
851	110-44-1	643460	C/C=C/C=C/C(=O)O	Sorbic acid	WSWCOQWTEOXDQX-MQQKCMAXSA-N	negative	0	test
852	4998-76-9	2723770	C1CCC(CC1)N.Cl	Cyclohexylamine.HCl	ZJUGSKJHHWASAF-UHFFFAOYSA-N	negative	0	test
853	79-19-6	2723789	C(=S)(N)NN	Thiosemicarbazide	BRWIZMBXBAOCCF-UHFFFAOYSA-N	negative	0	test
854	20265-97-8	2734956	COC1=CC=C(C=C1)N.Cl	p-Anisidine.HCl	VQYJLACQFYZHCO-UHFFFAOYSA-N	cancer-other	1	test
855	105-55-5	2735009	CCNC(=S)NCC	N,N'-Diethylthiourea	FLVIGYVXZHLUHP-UHFFFAOYSA-N	cancer-other	1	test
856	1150-37-4	4180030	COC1=CC2=C(C(=C1)OC)C3=C(CCC3=O)C(=O)O2	5,7-Dimethoxycyclopentenone[2,3-c]coumarin	JXDKCTHGAOIBAD-UHFFFAOYSA-N	negative	0	test
857	156-62-7	4685067	C(#N)N=[Ca]	Cyanamide, calcium	QFSRQFUIHVTIDL-UHFFFAOYSA-N	negative	0	test
858	121-88-0	4984721	C1=CC(=C(C=C1[N+](=O)[O-])O)N	2-Amino-5-nitrophenol	DOPJTDJKZNWLRB-UHFFFAOYSA-N	cancer-other	1	test
859	590-21-6	5284364	C/C=C/Cl	1-Chloropropene	OWXJKYNZGFSVRC-NSCUHMNNSA-N	cancer-other	1	test
860	868-85-9	6327114	CO[P+](=O)OC	Dimethyl hydrogen phosphite	YLFBFPXKTIQSSY-UHFFFAOYSA-N	cancer-other	1	test
861	57590-21-3	9556442	CC(C)C/C=N/N(C)C=O	3-Methylbutanal methylformylhydrazone	GZCRKMACGRBALK-VMPITWQZSA-N	cancer-liver	1	test
862	5461-85-8	9570205	CC(C)CN(/C(=N/[N+](=O)[O-])/N)N=O	N-Isobutyl-N'-nitro-N-nitrosoguanidine	SSNMTYTXJCMMSO-UHFFFAOYSA-N	negative	0	test
863	70-25-7	135436526	CN(C(=N)N[N+](=O)[O-])N=O	N-Methyl-N'-nitro-N-nitrosoguanidine	VZUNGTLZRAYYDE-UHFFFAOYSA-N	cancer-other	1	test
